# Supplementary material
Source: publisher site journal article supplement (doi:10.3762/bjoc.1.9)

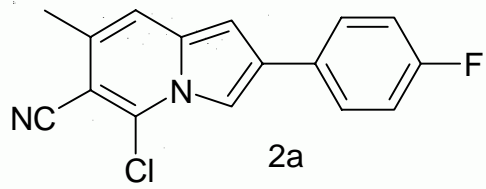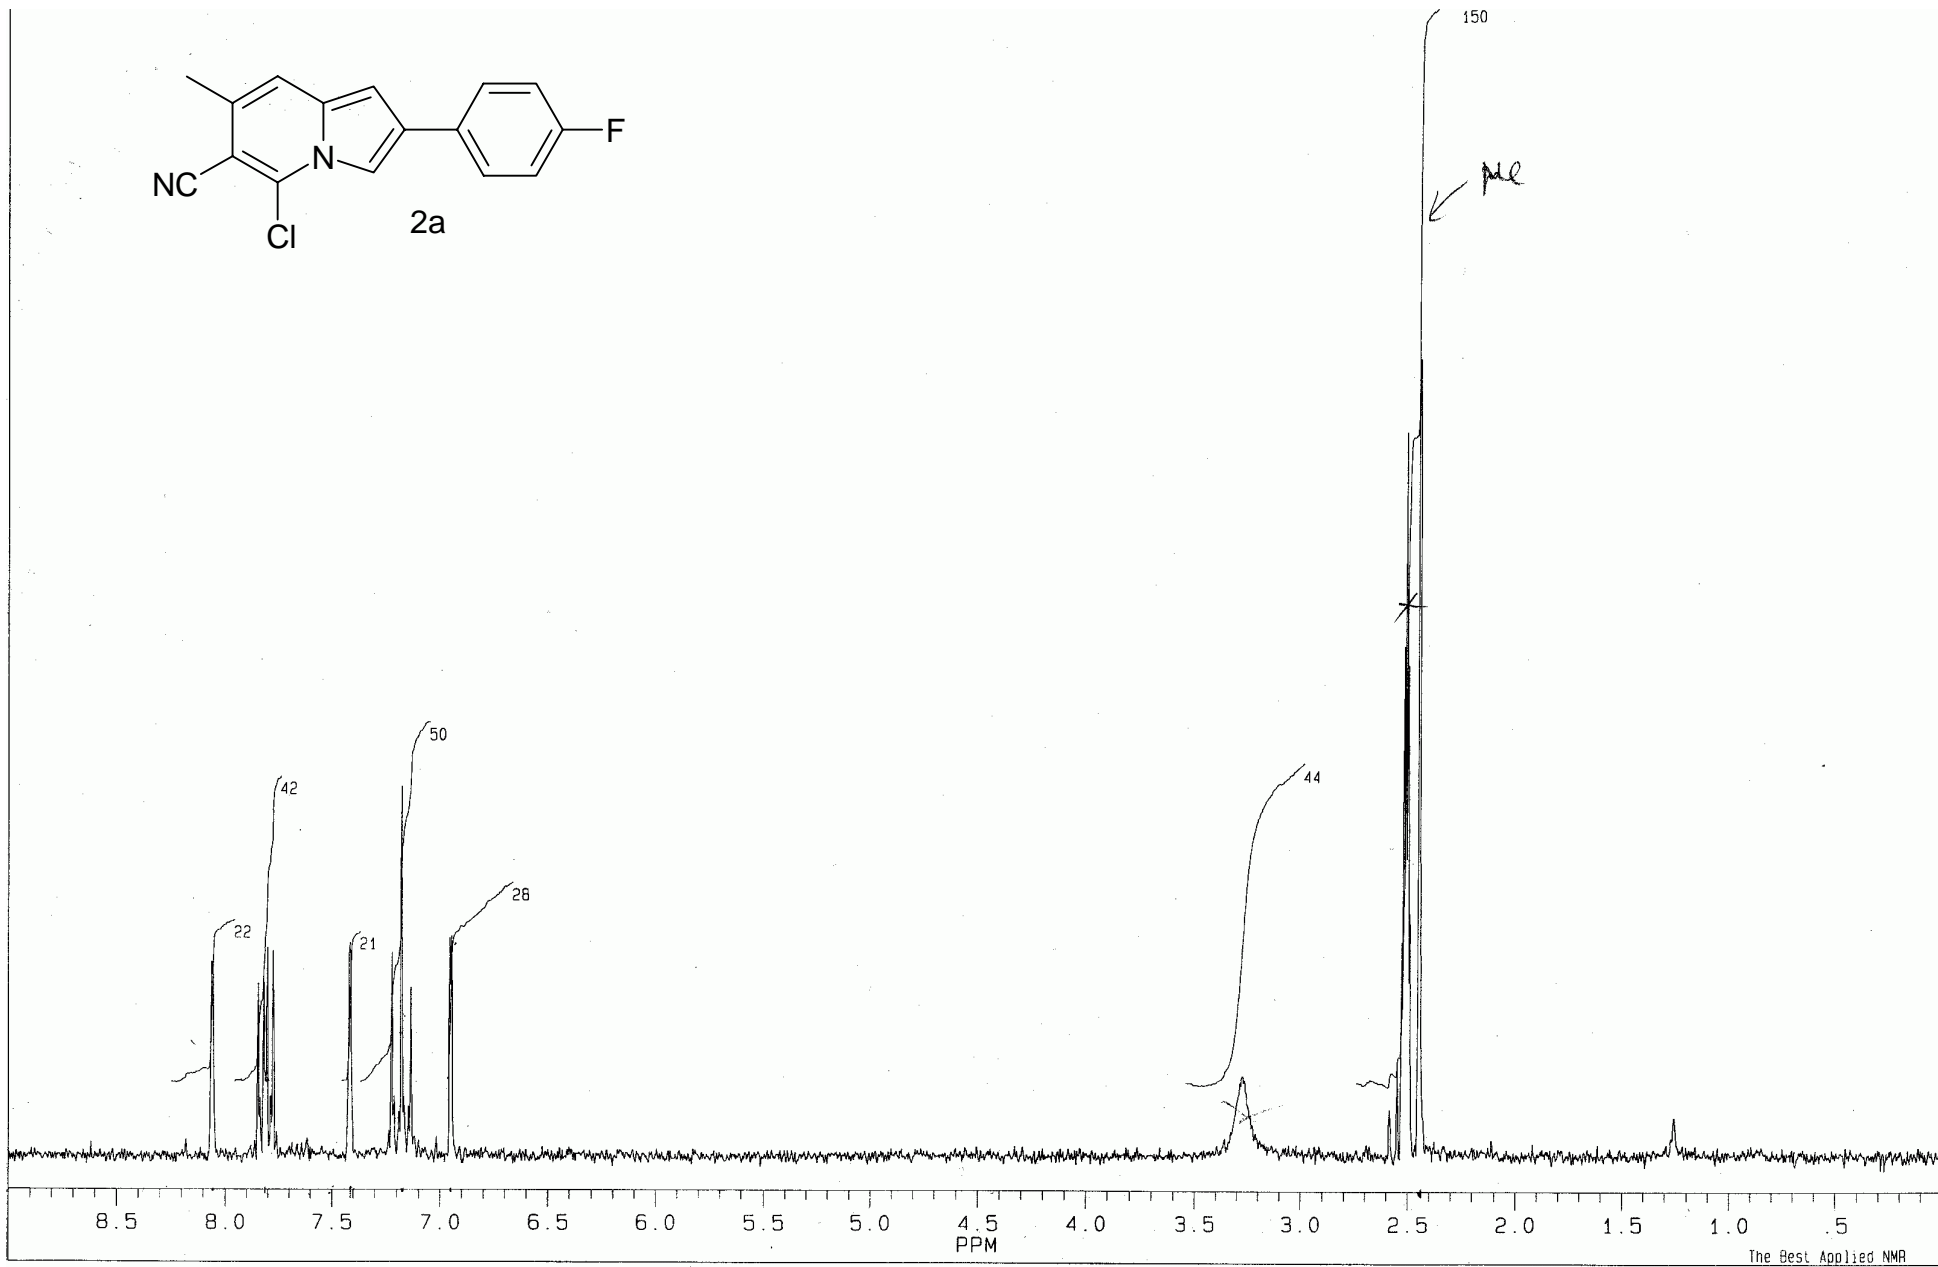

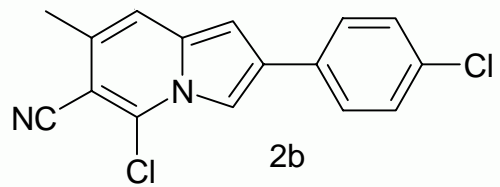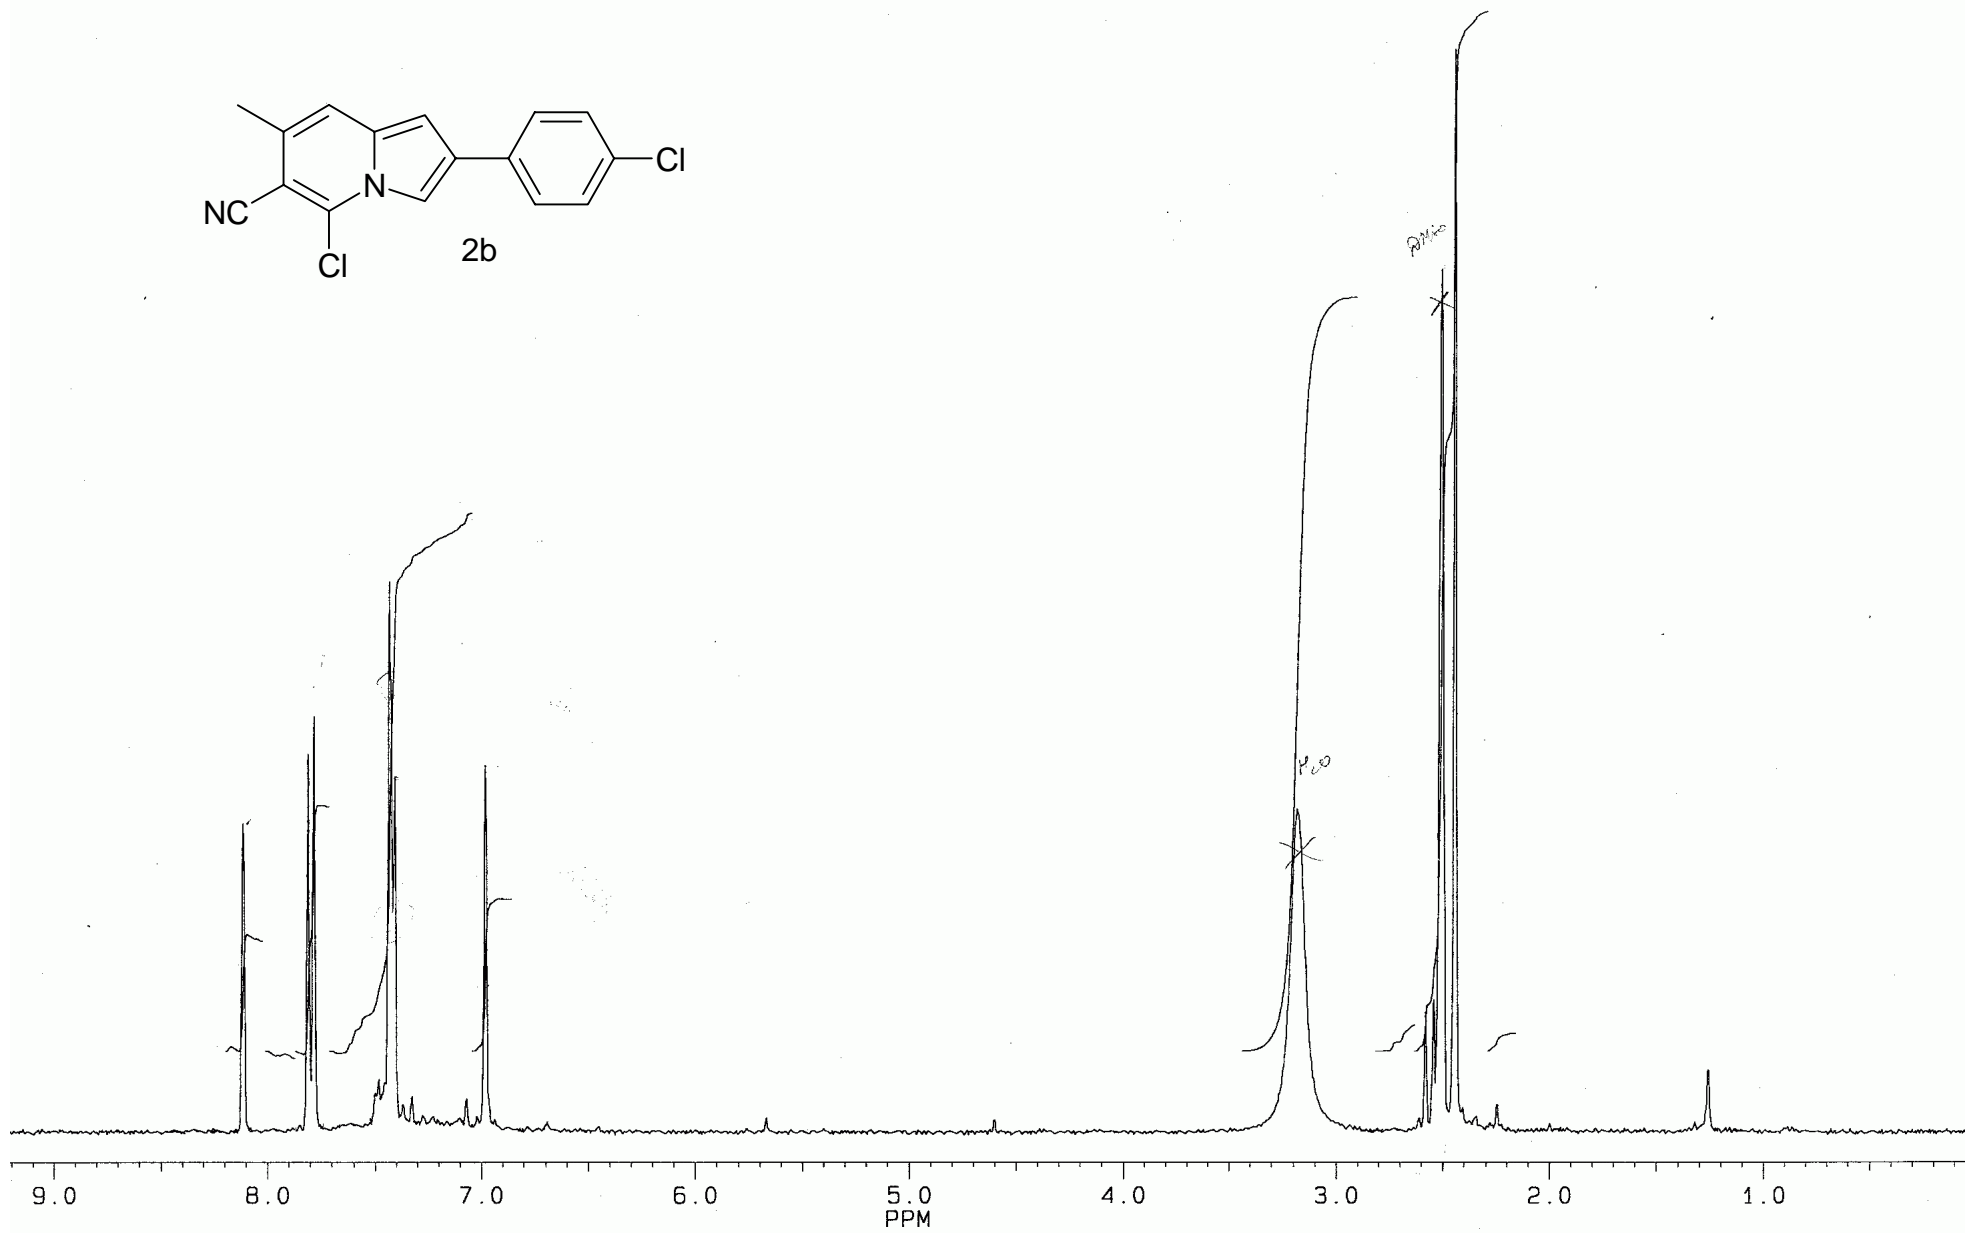

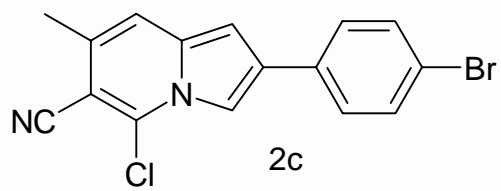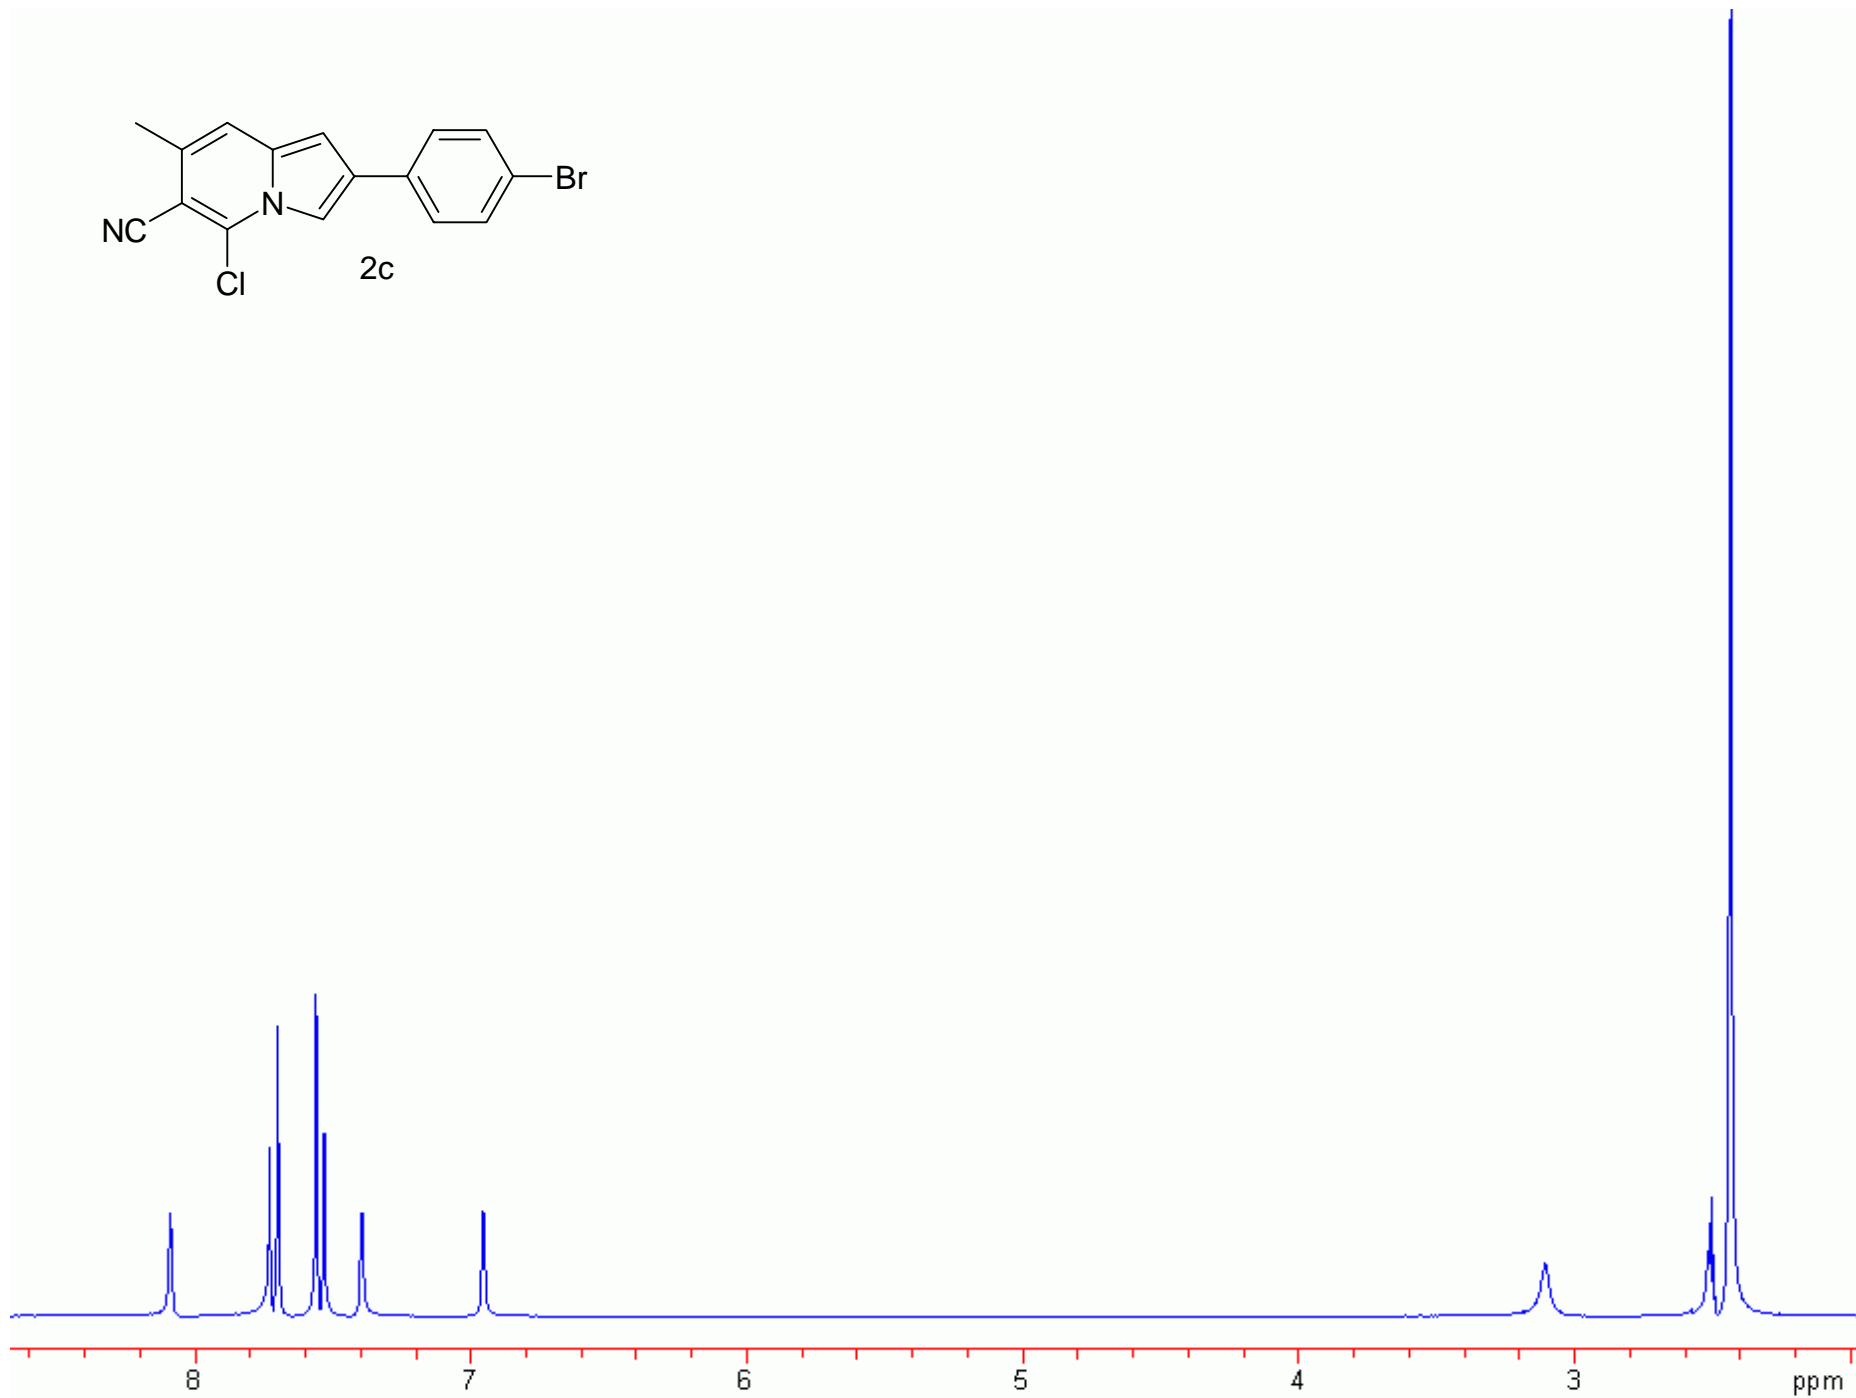

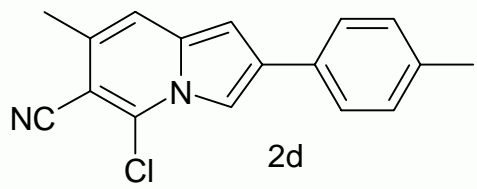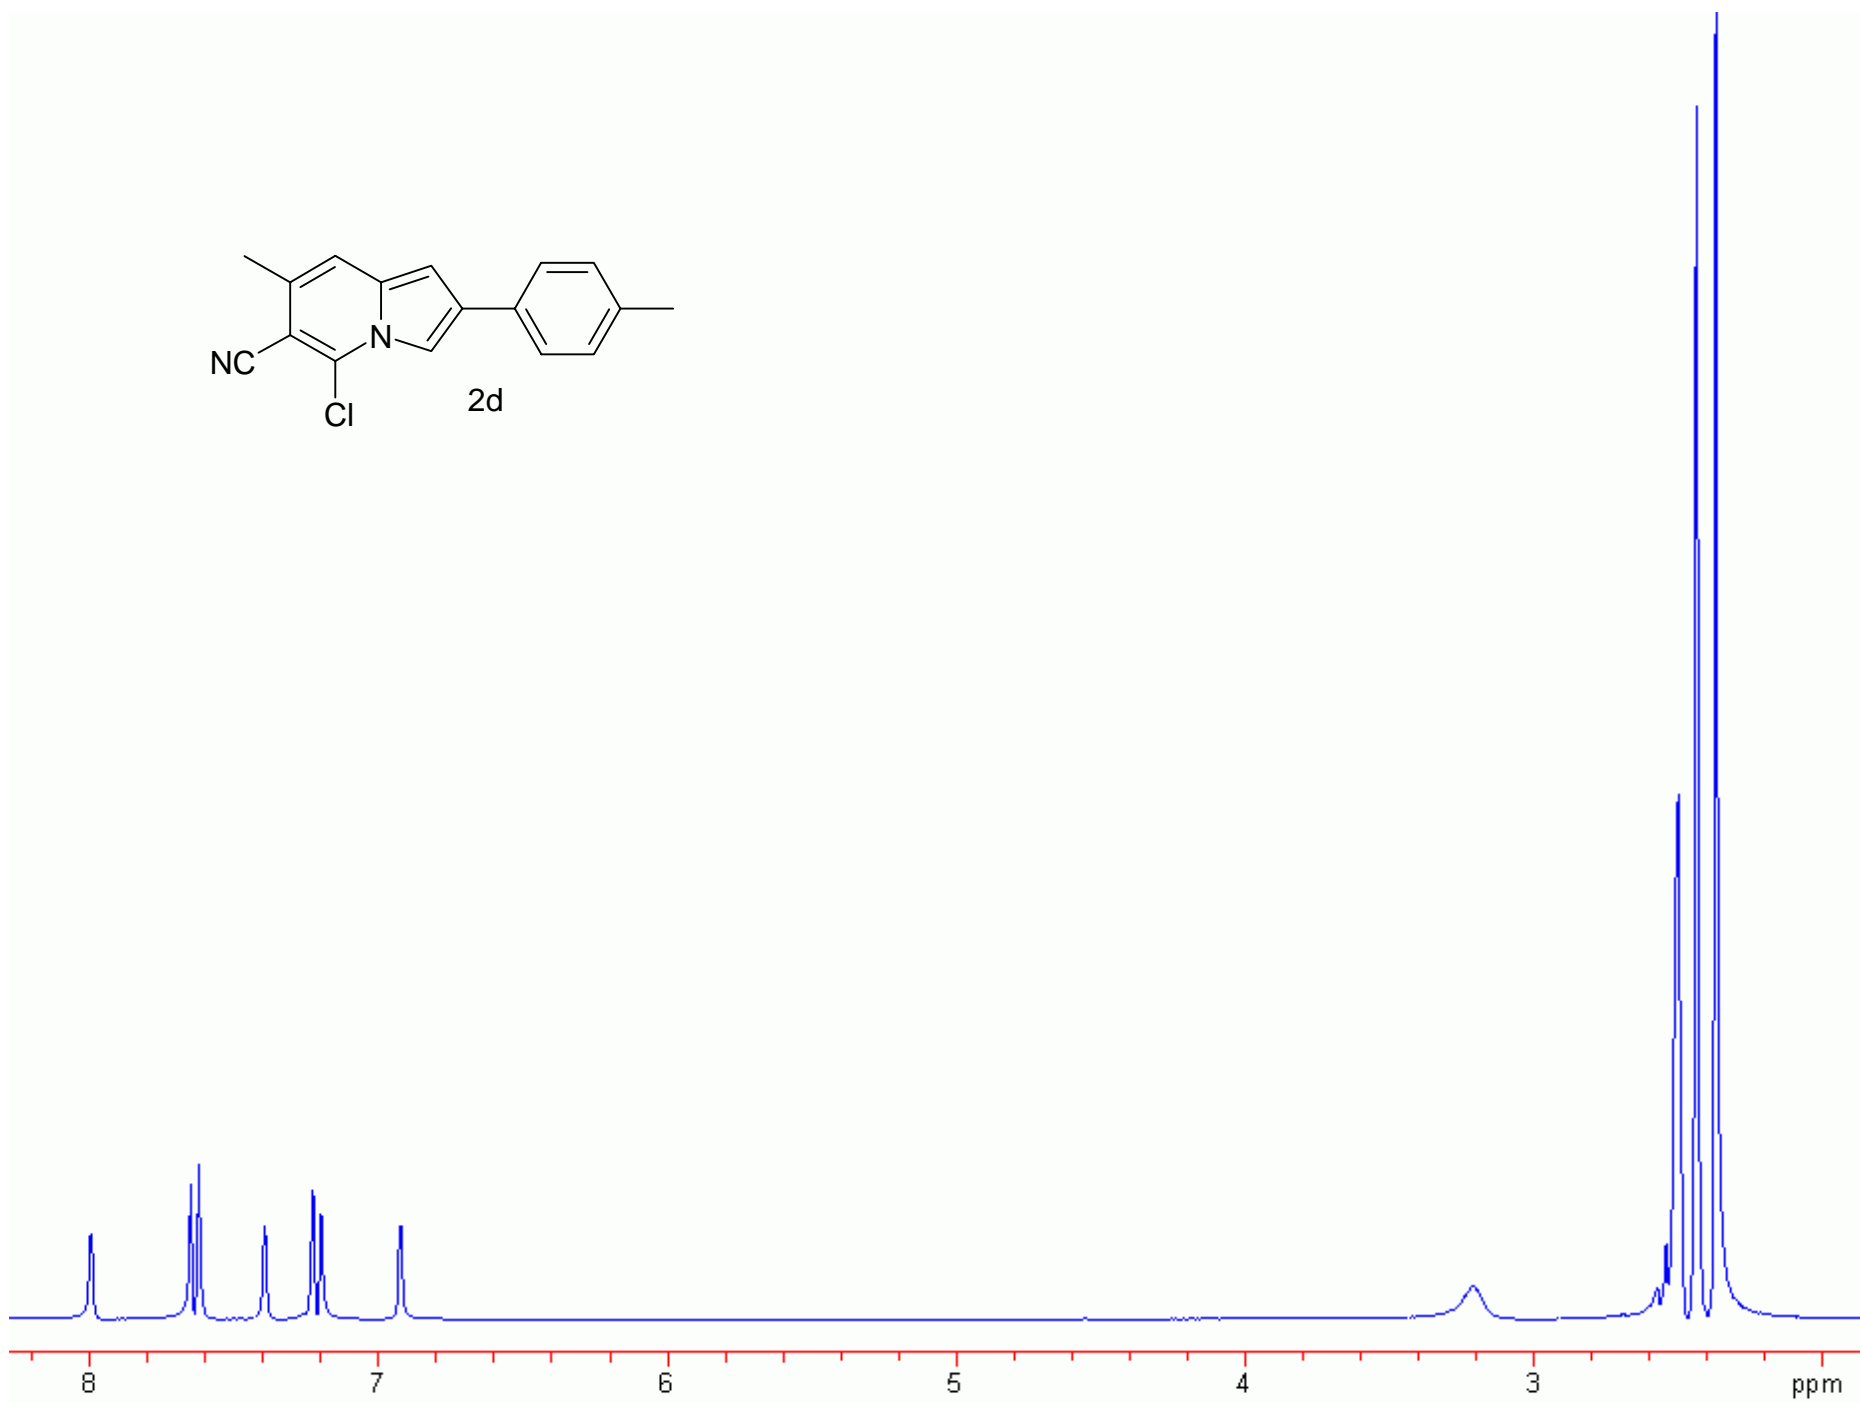

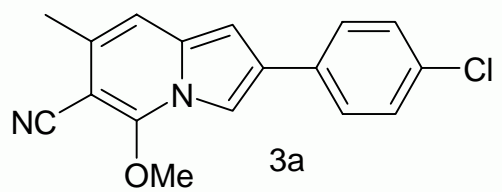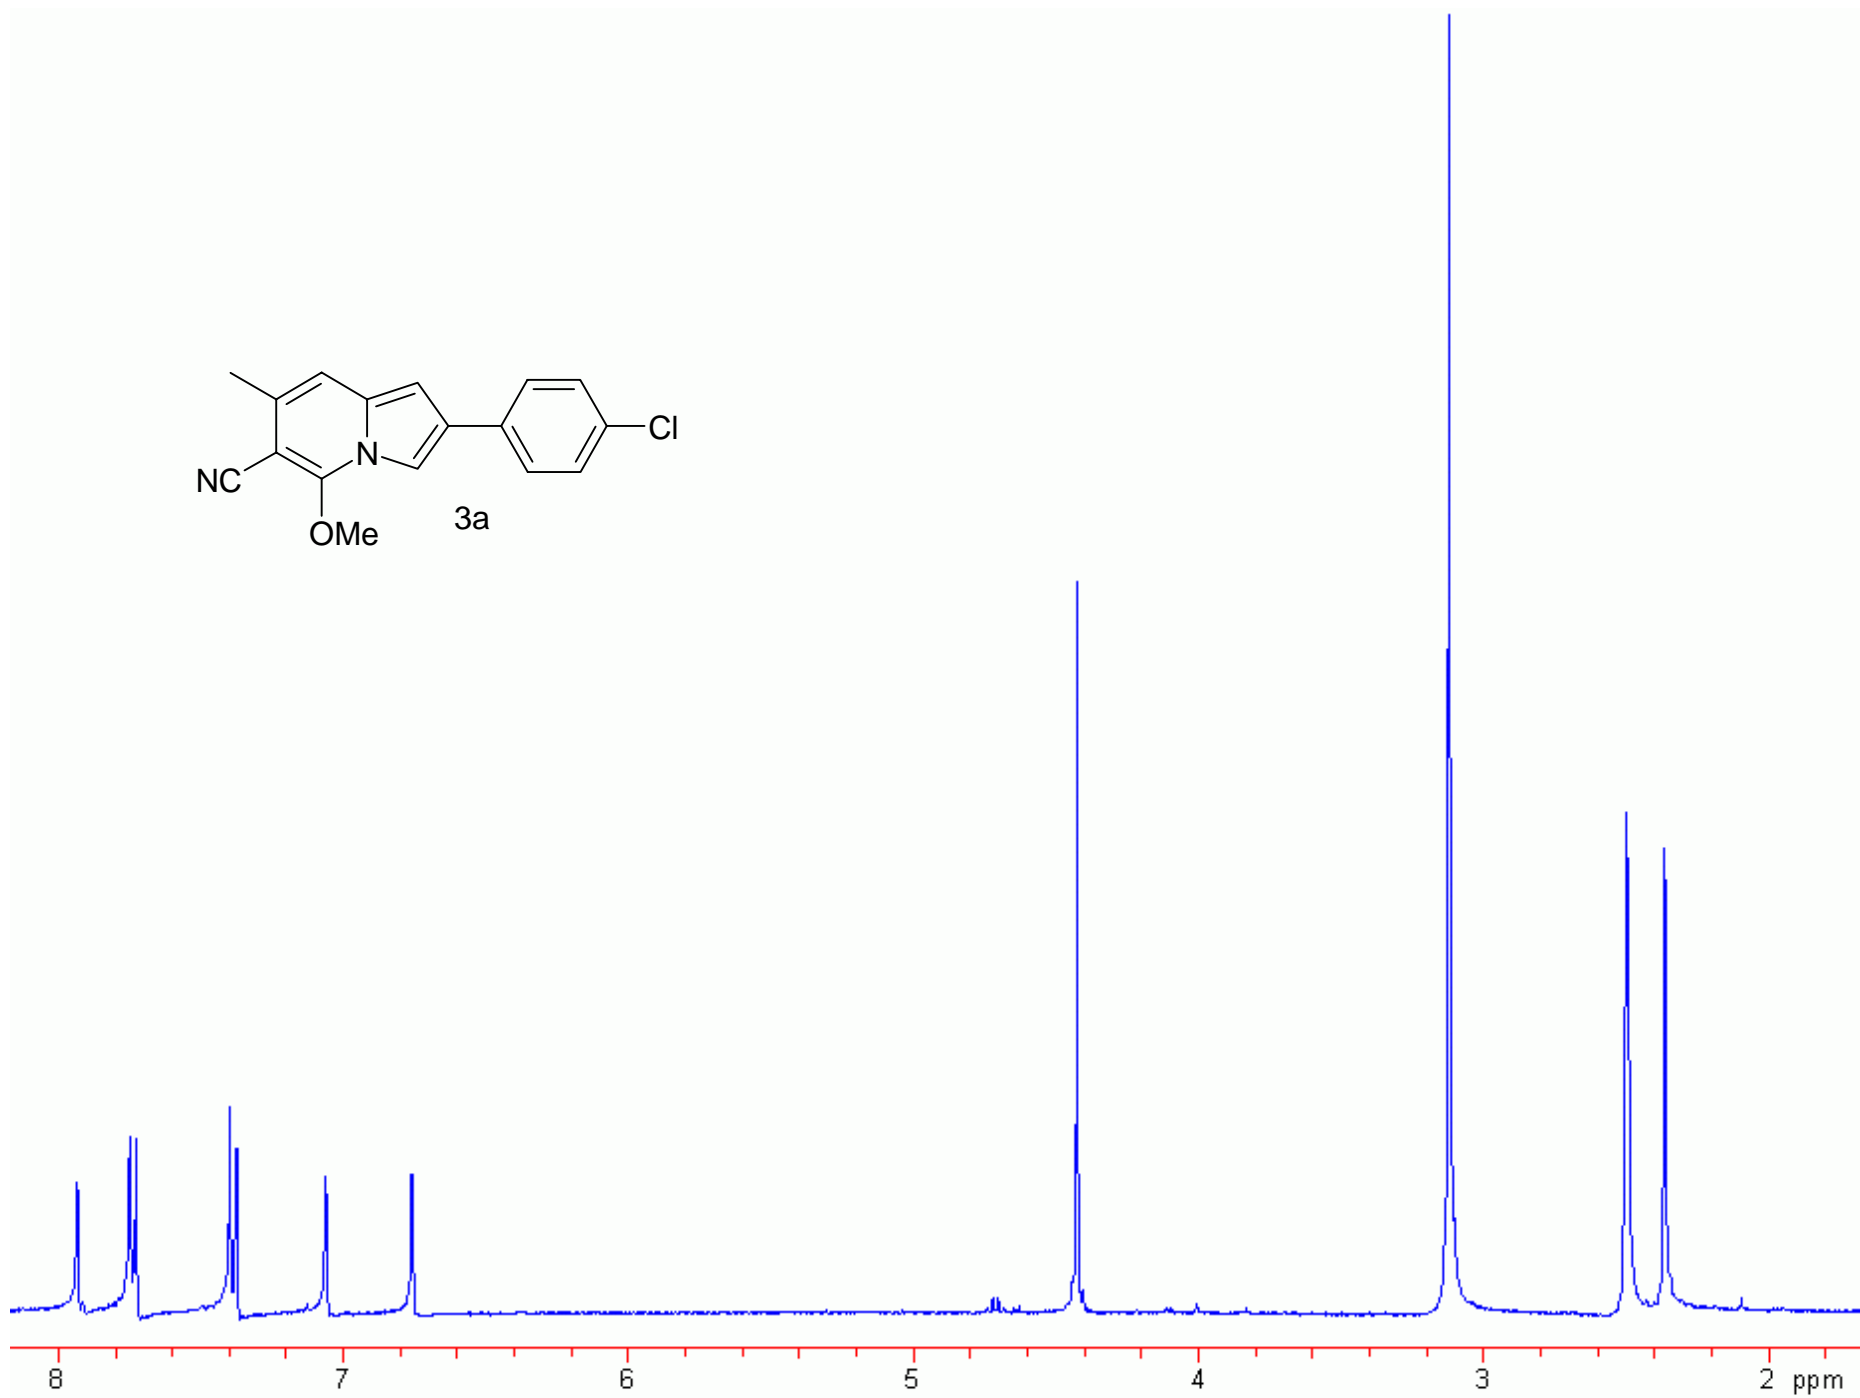

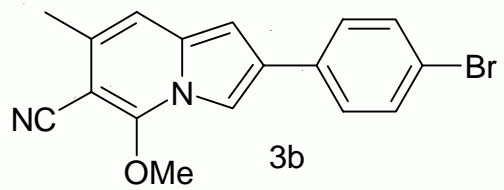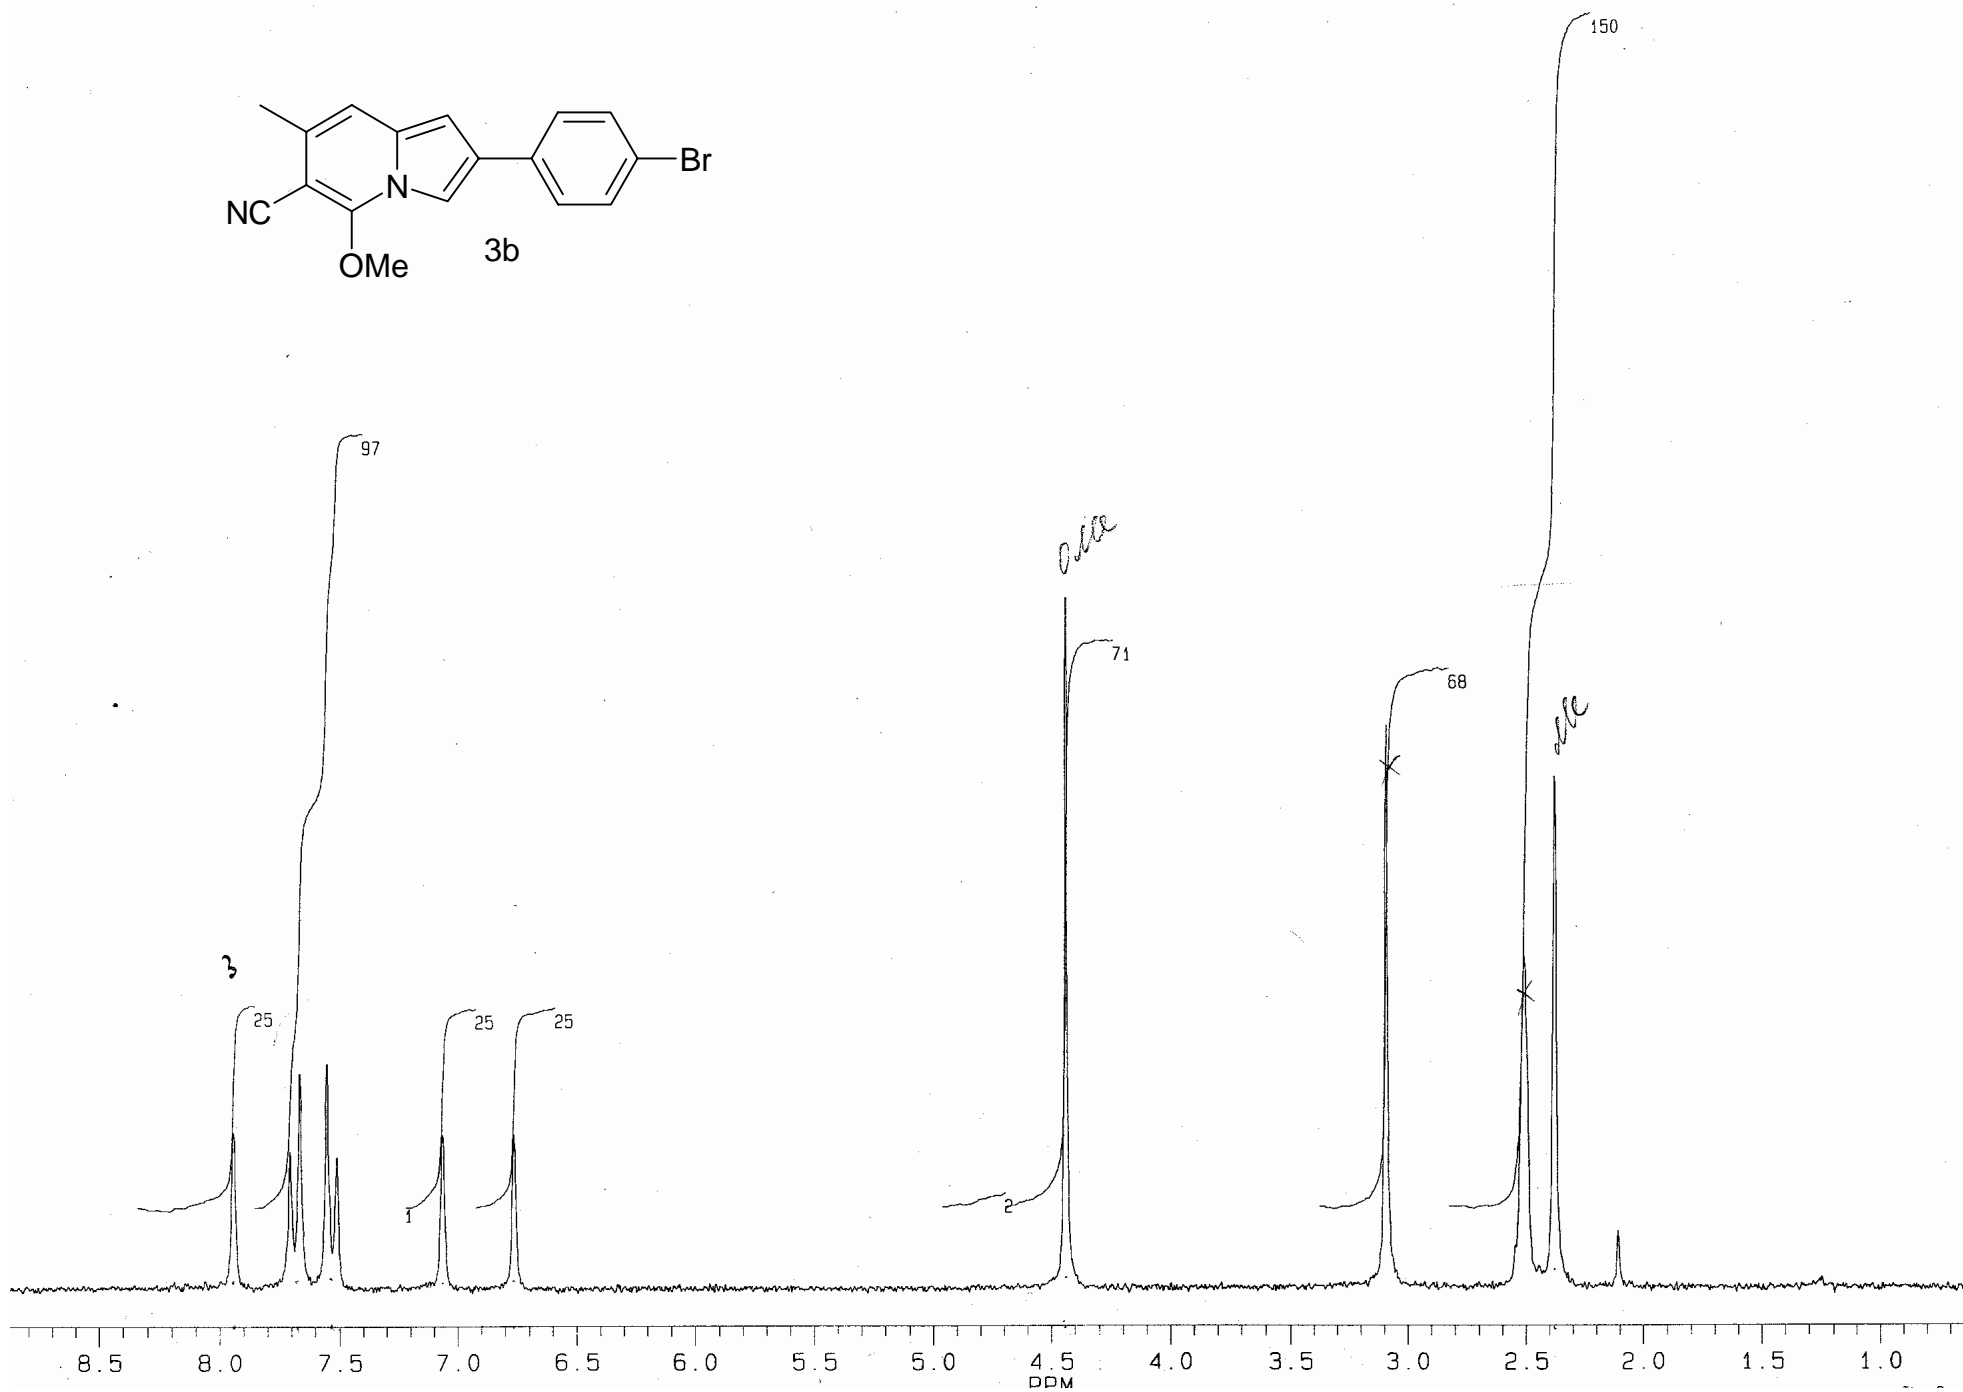

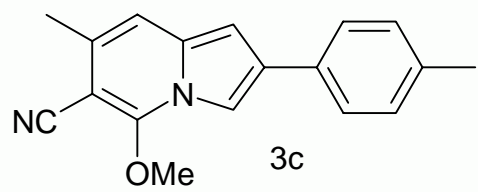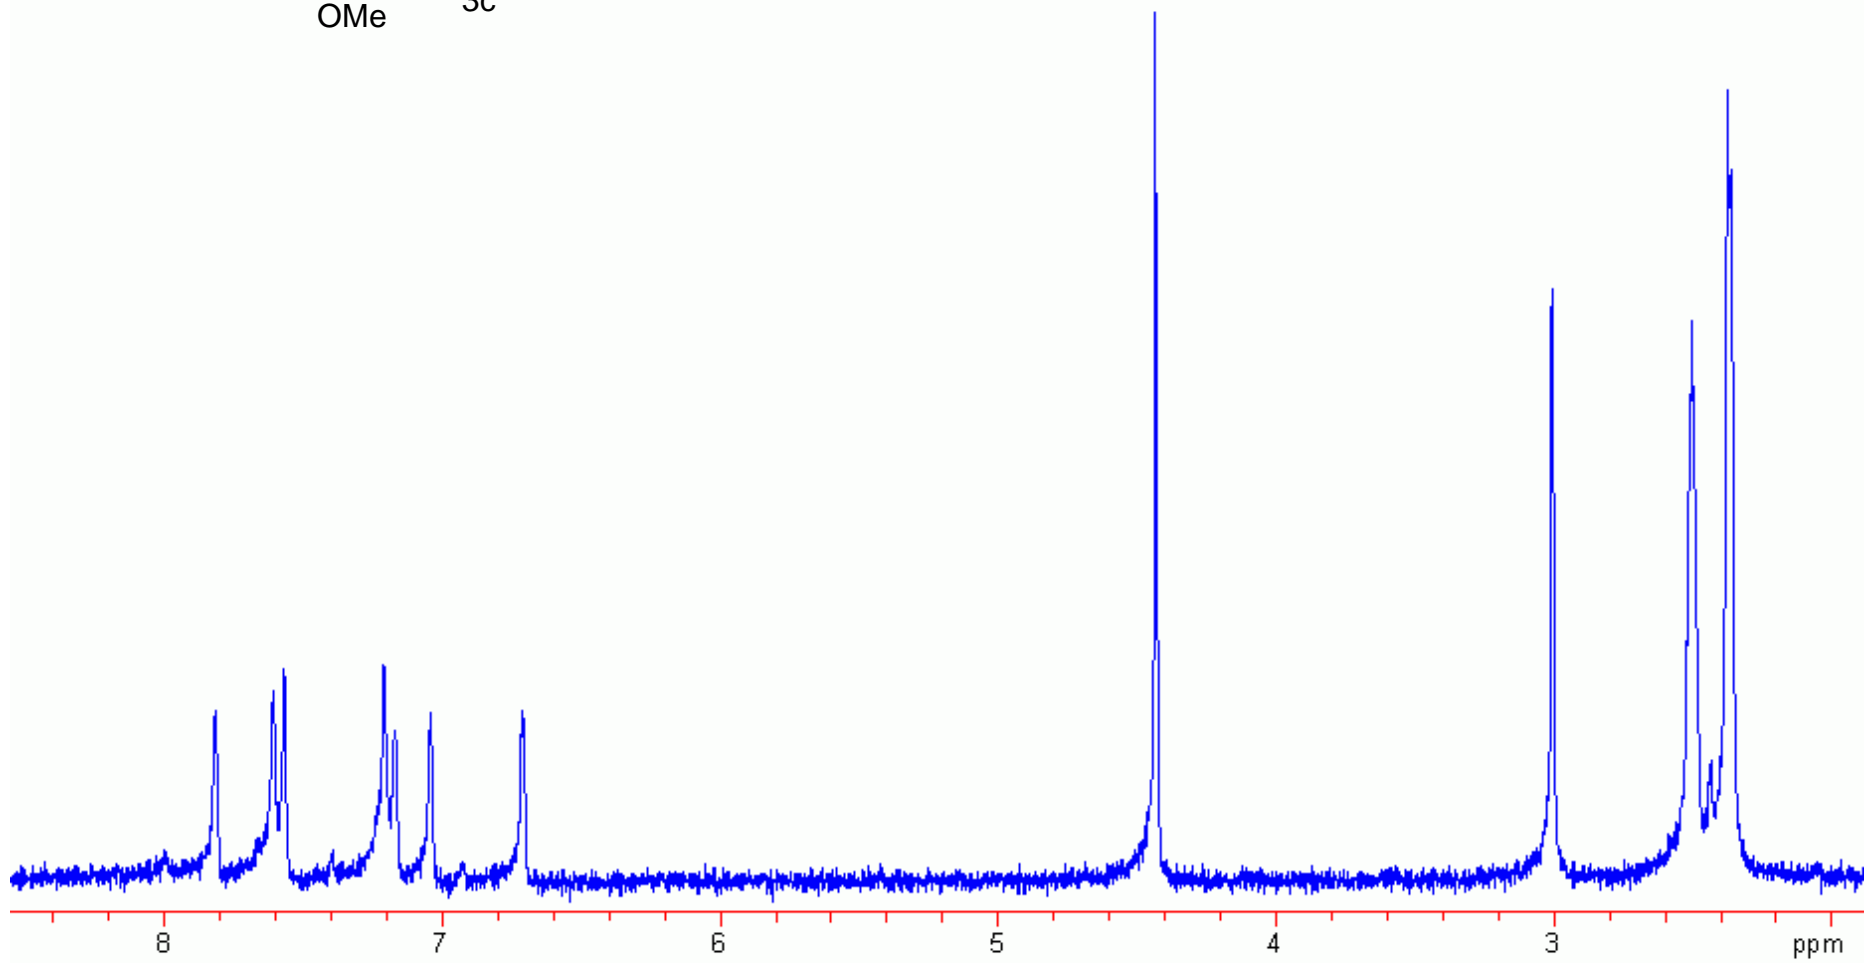

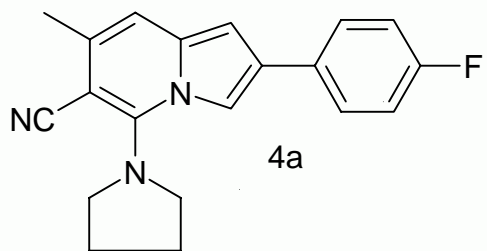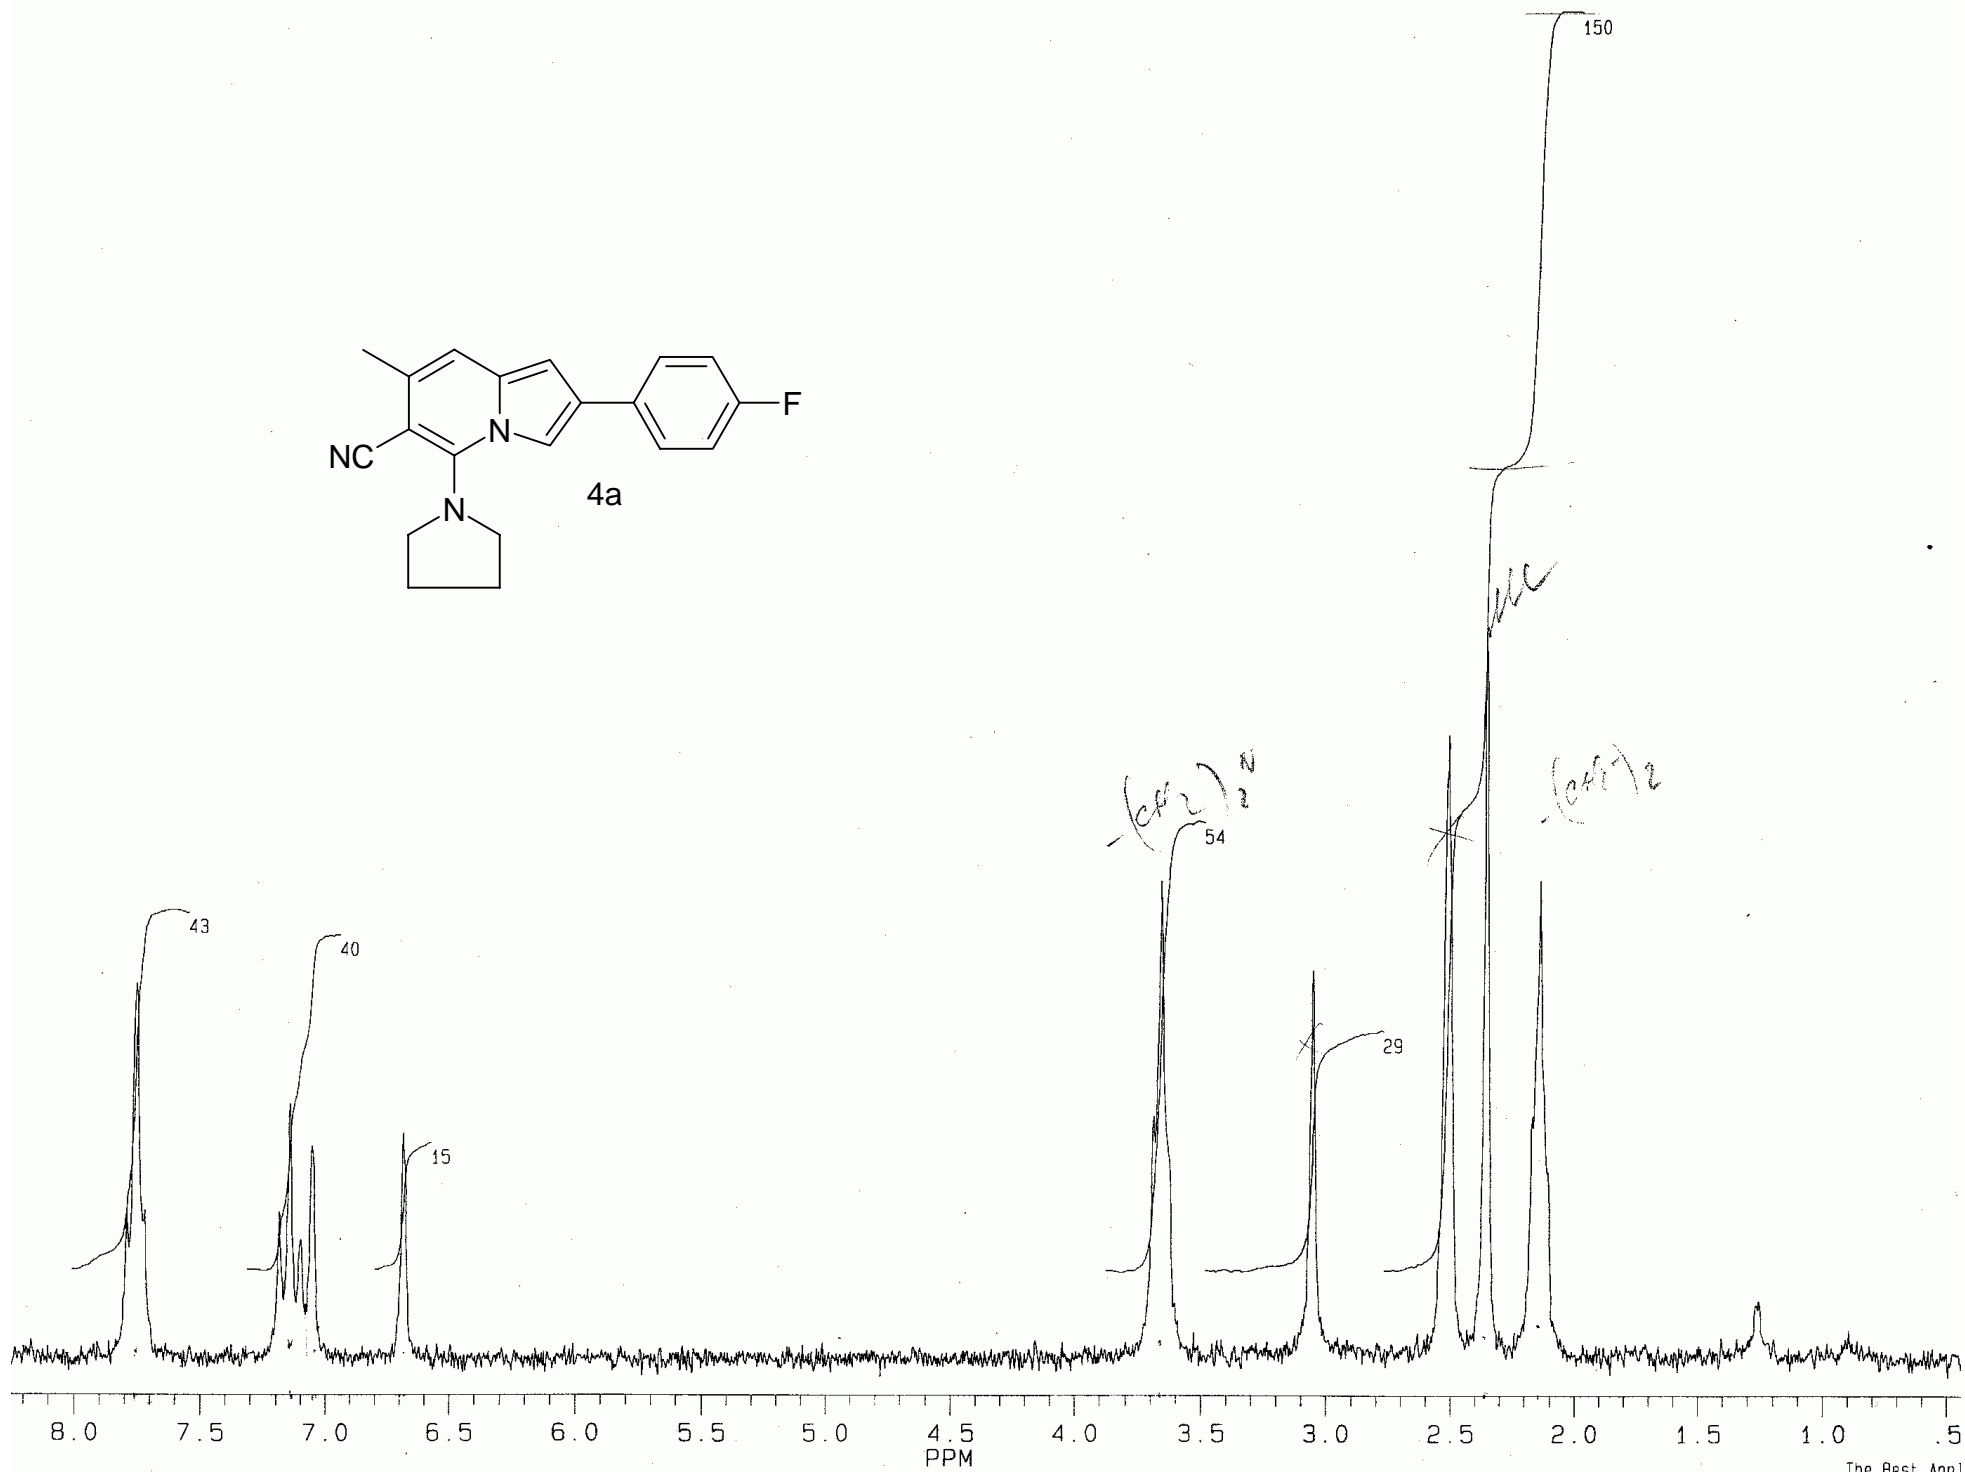



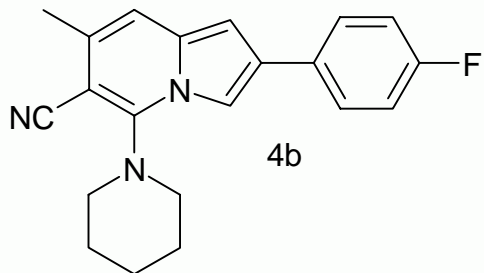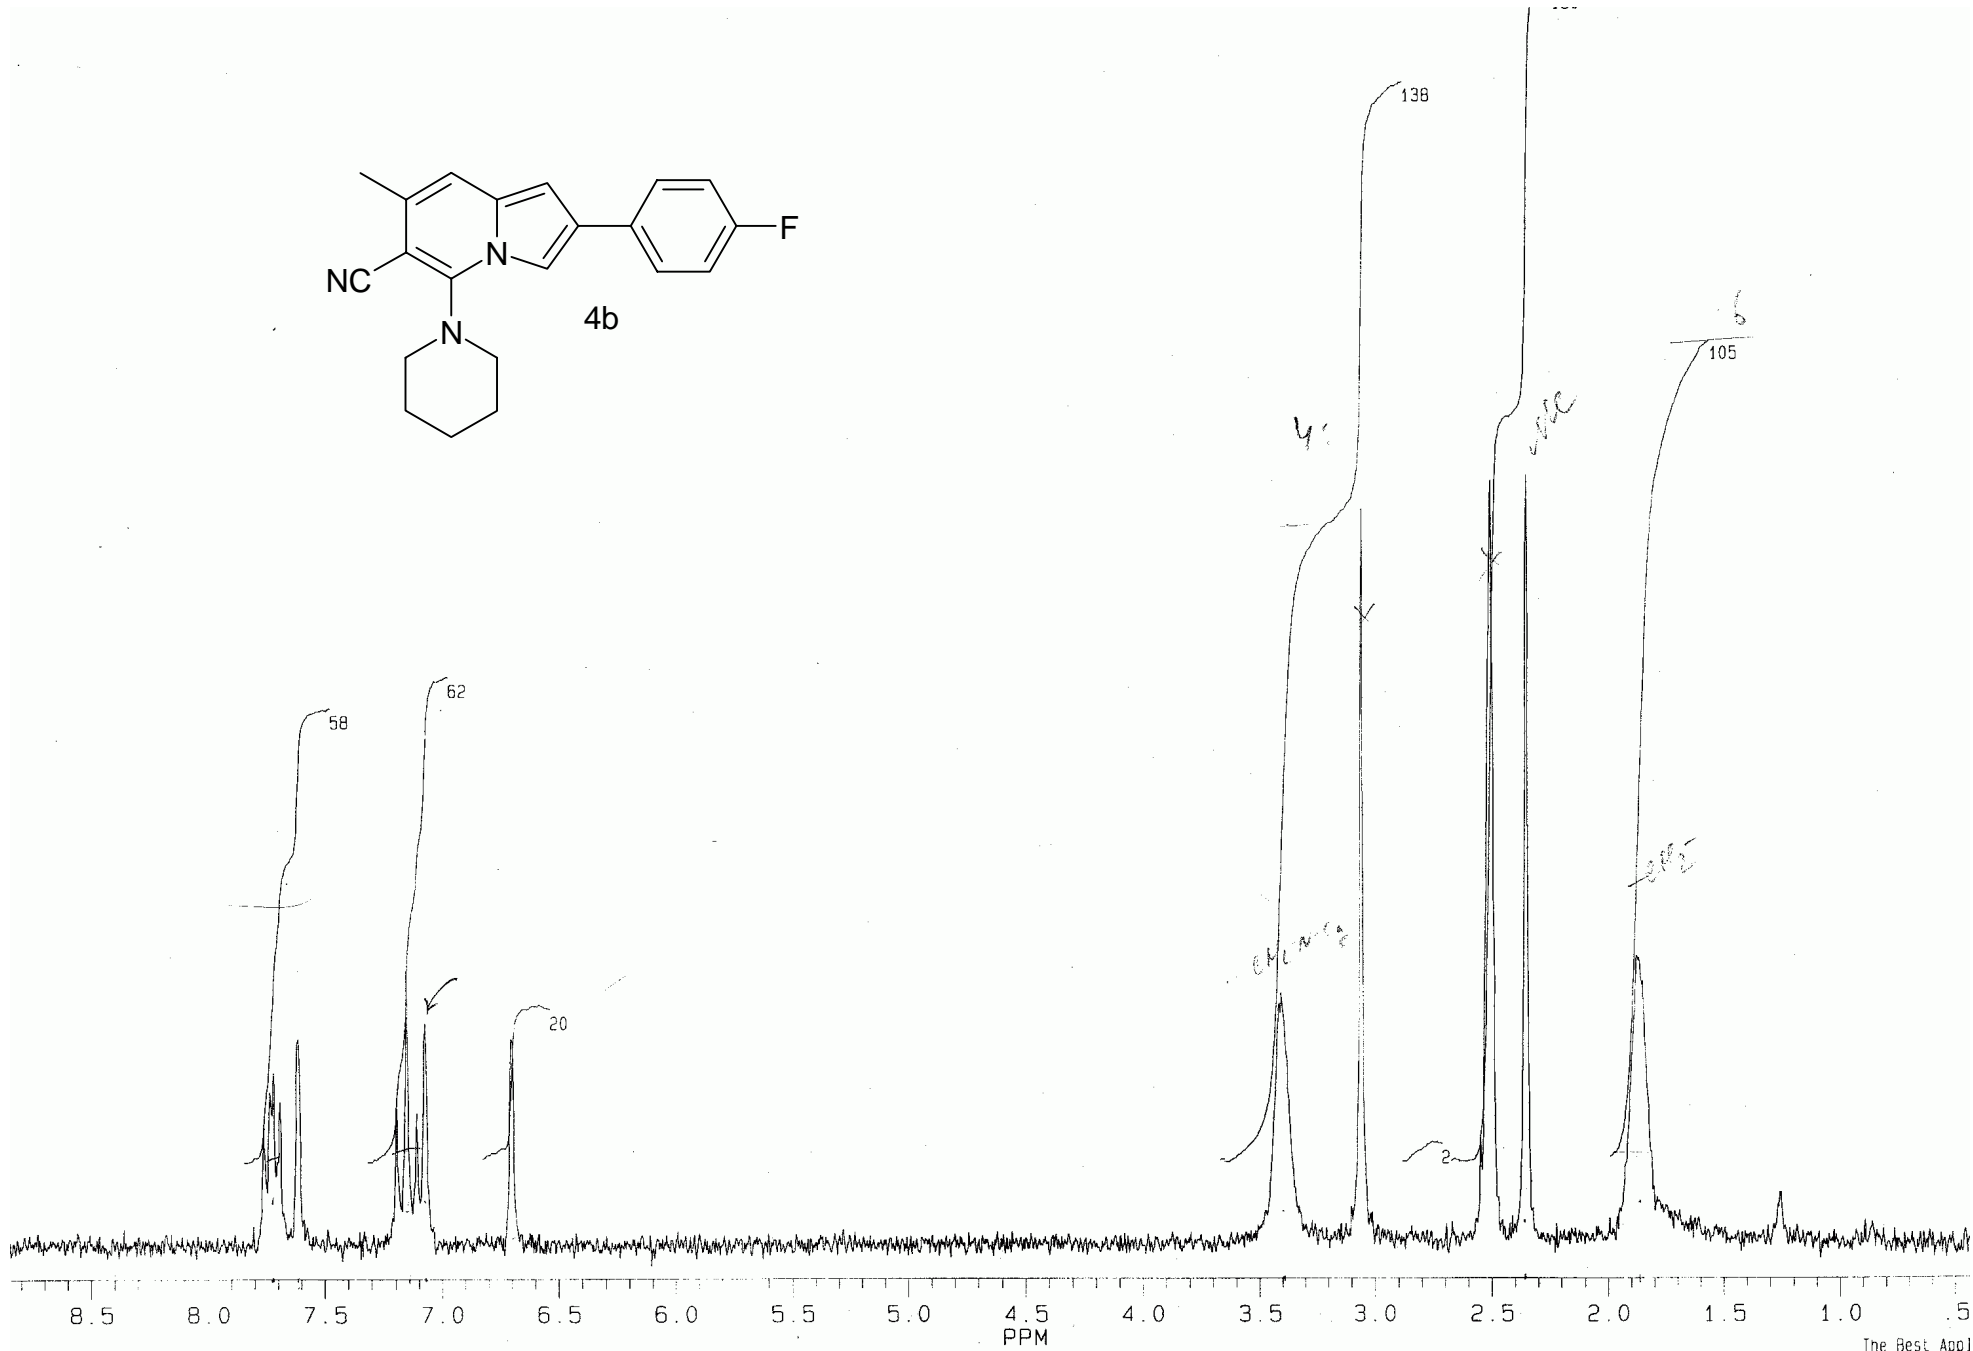

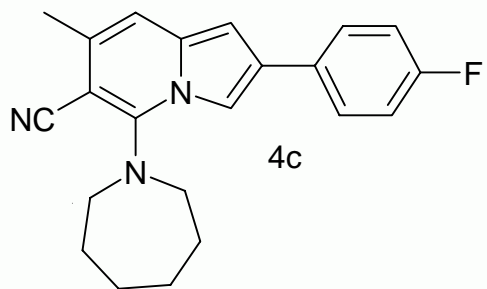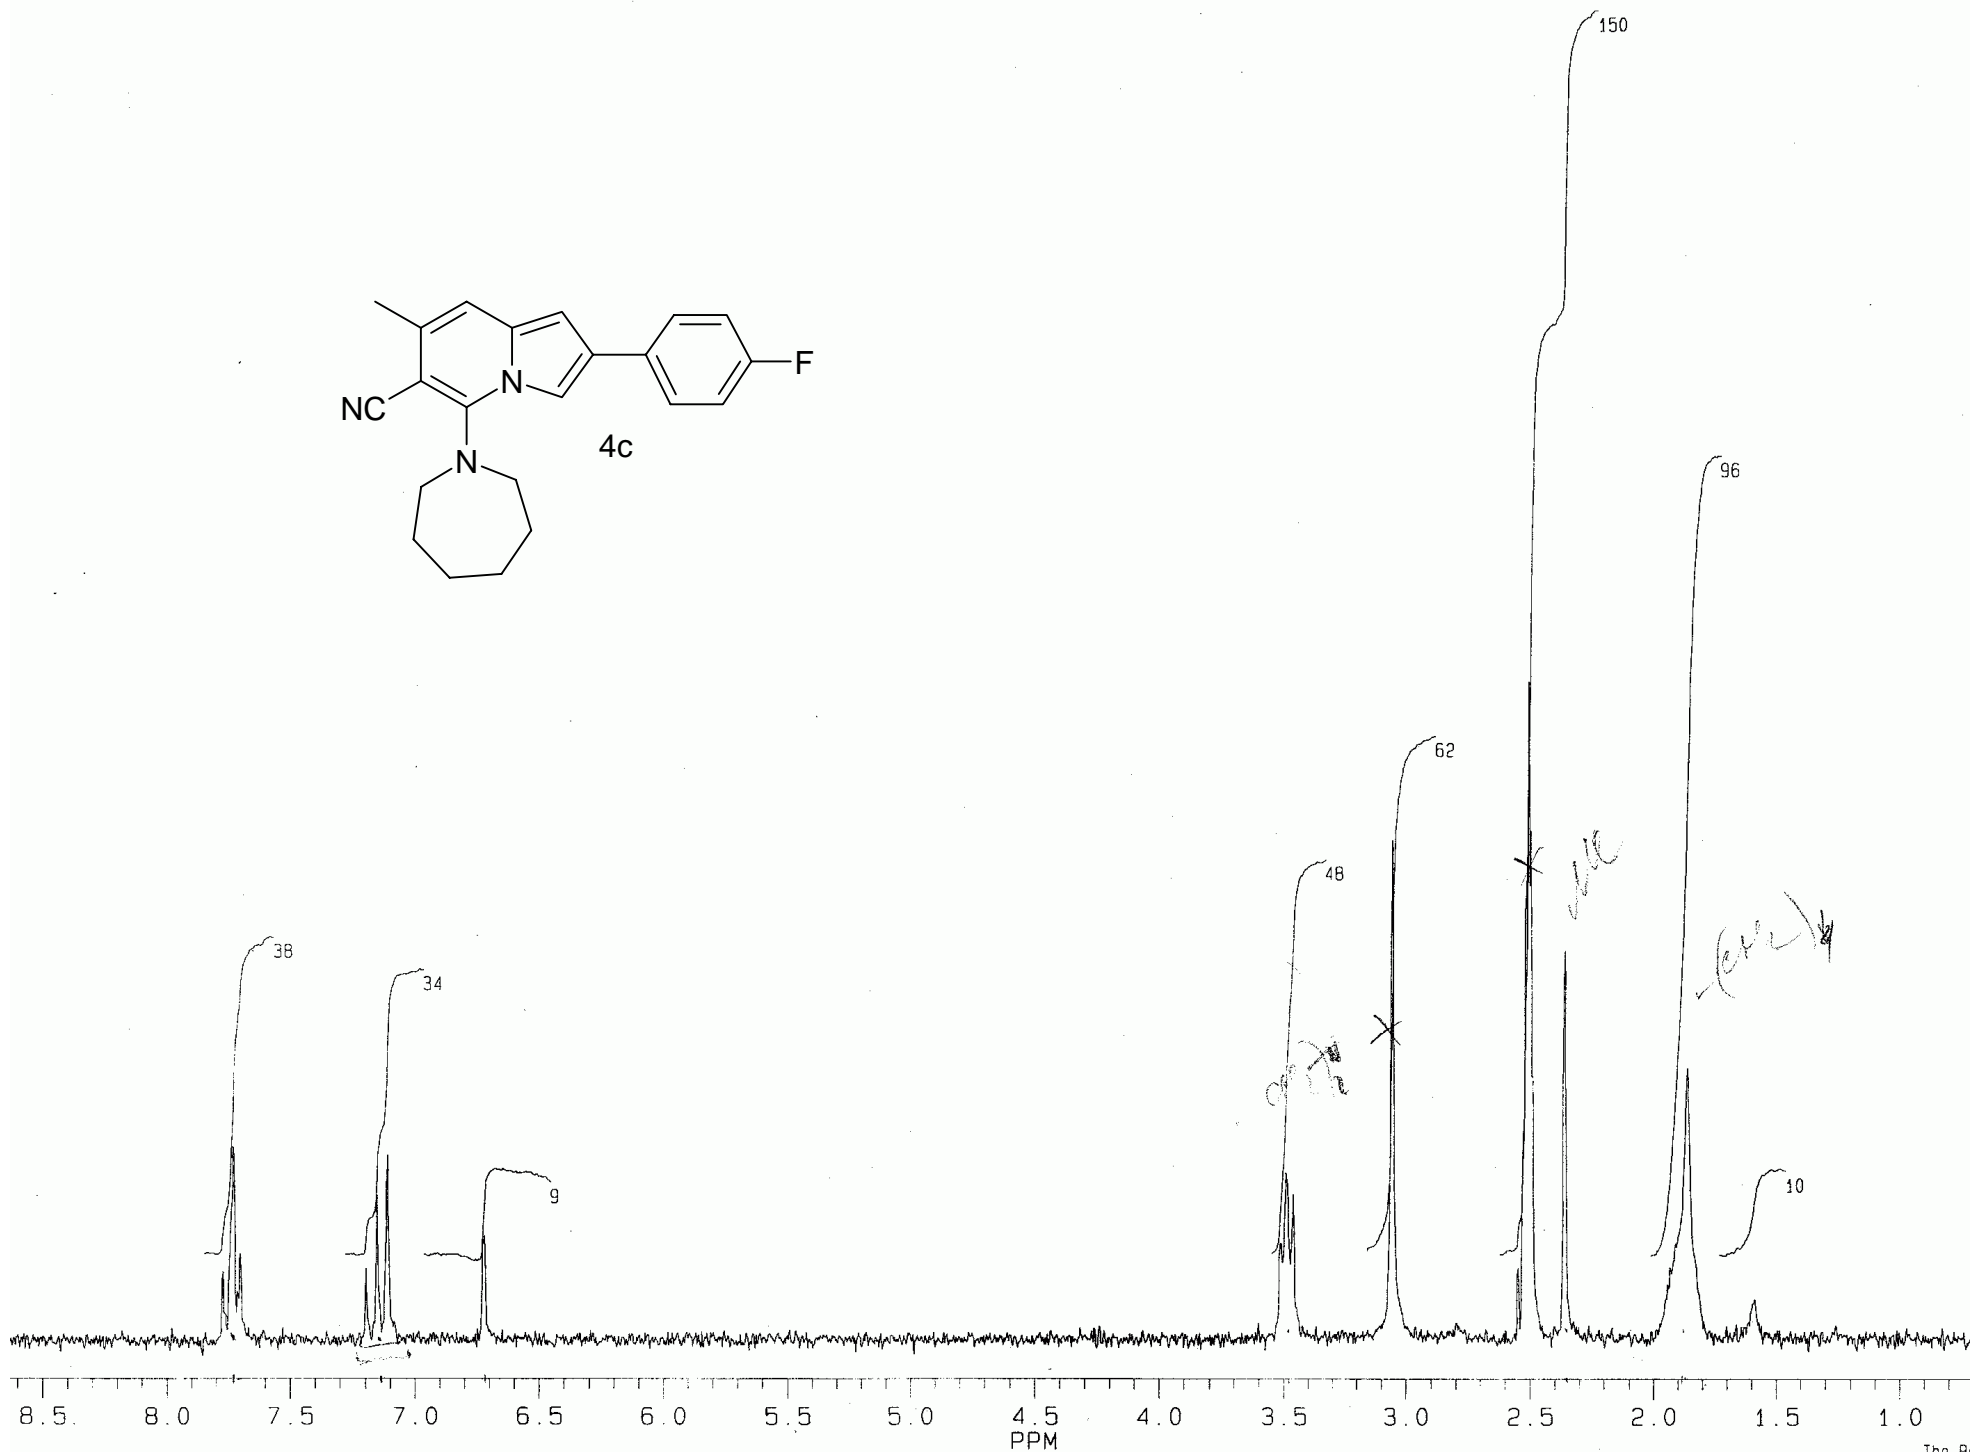

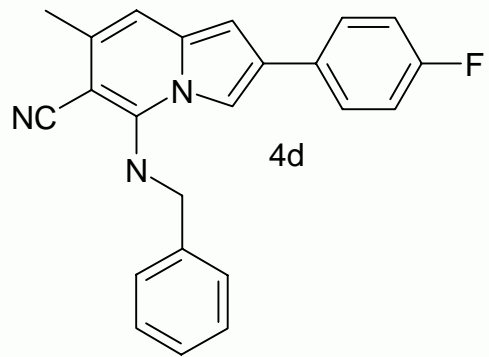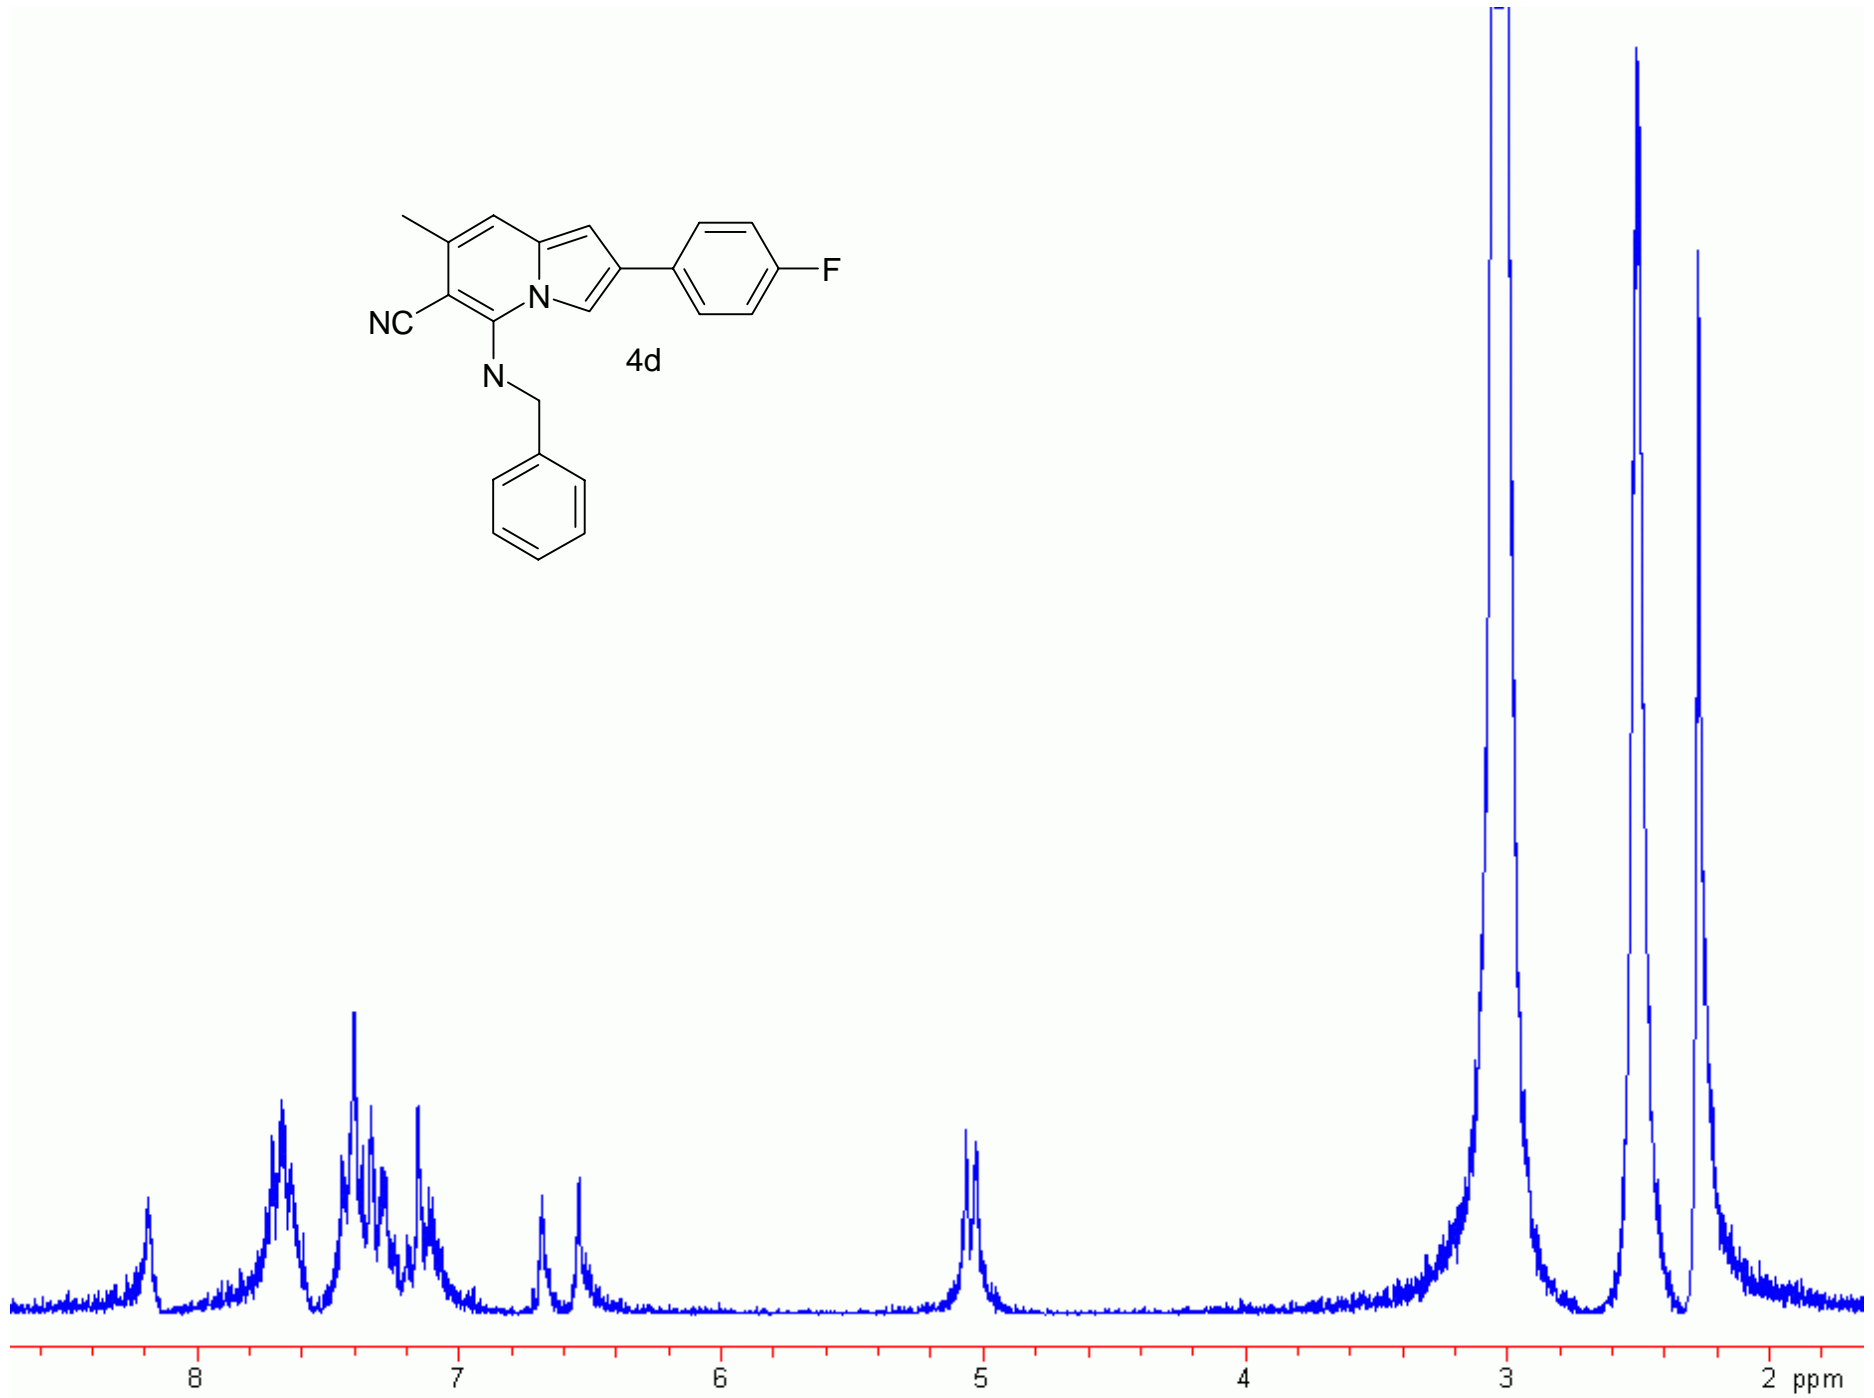

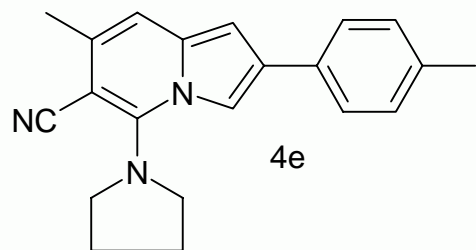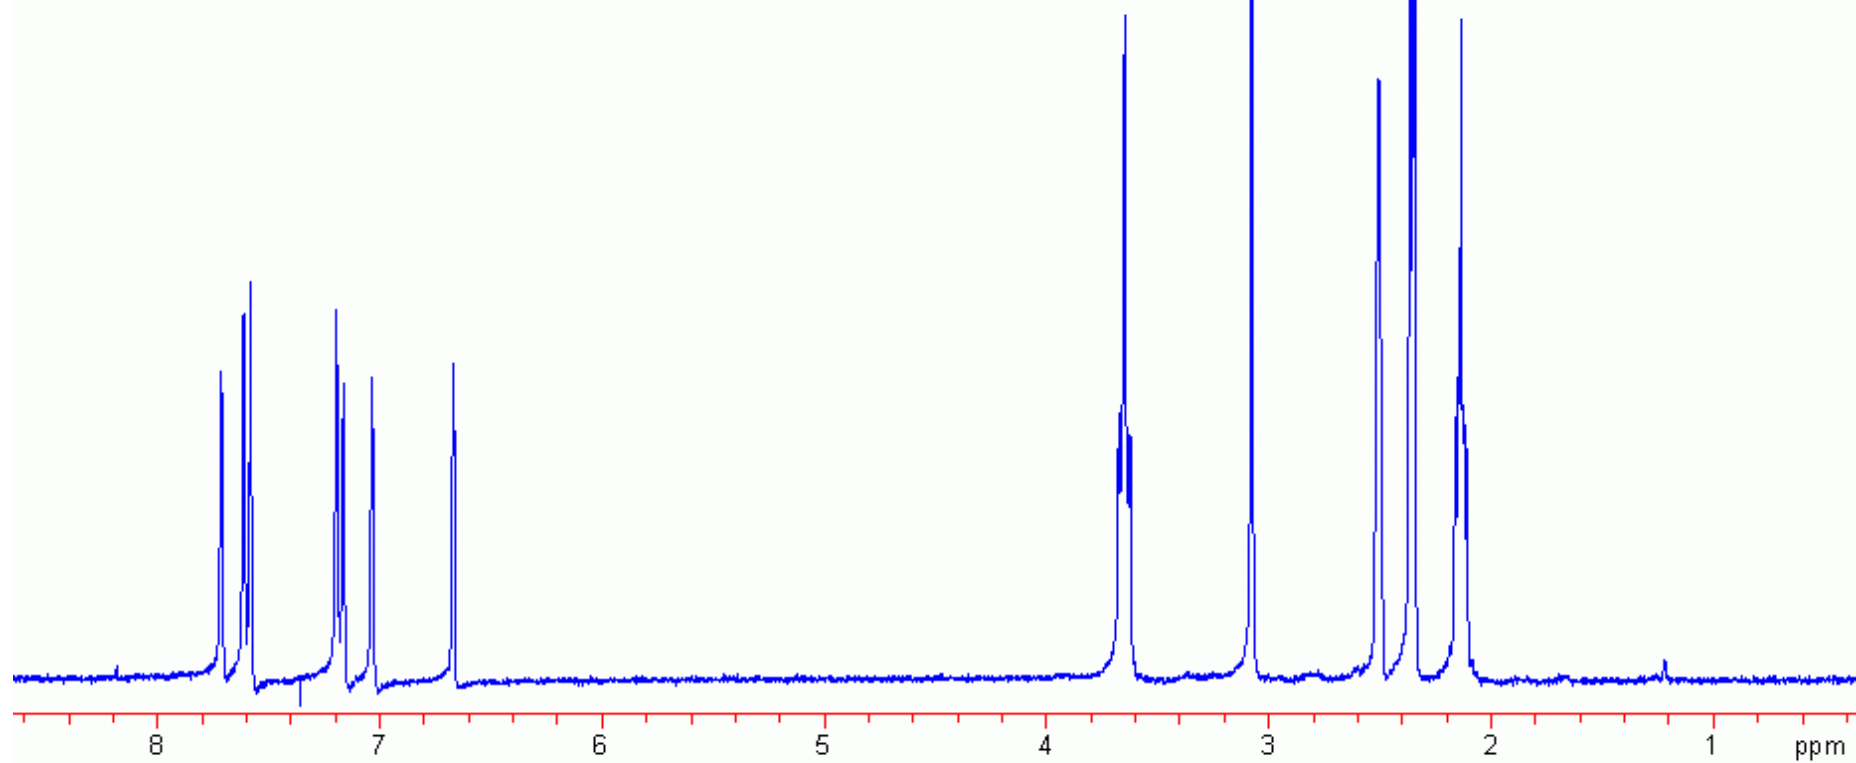

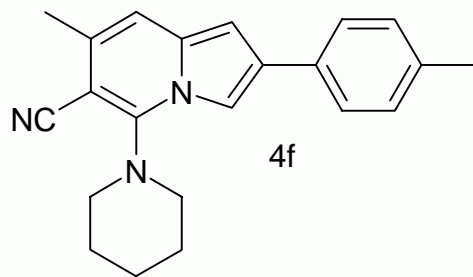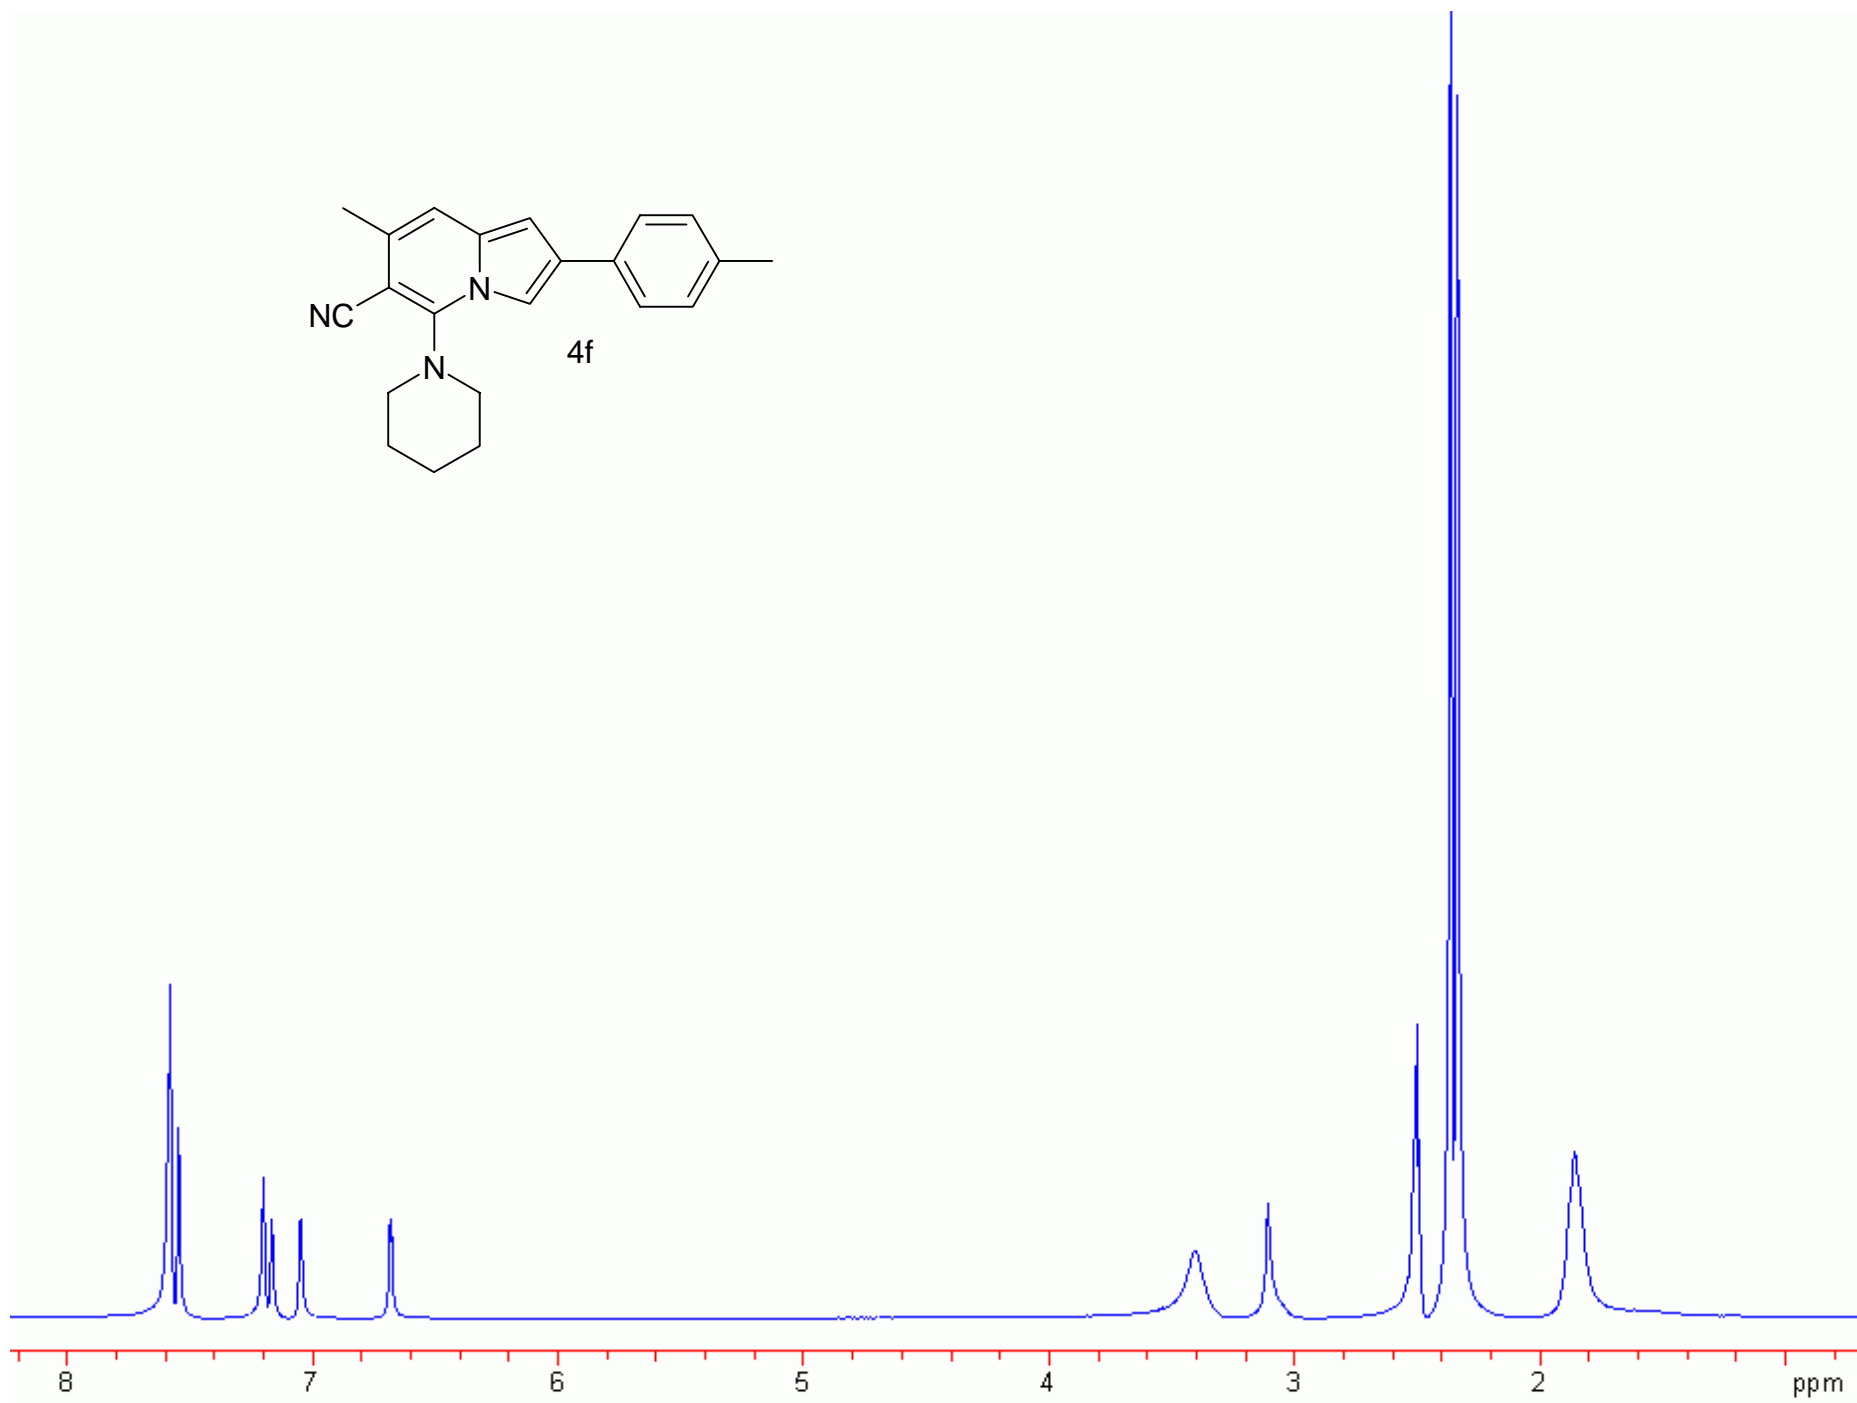

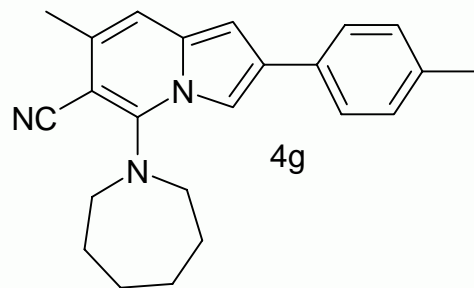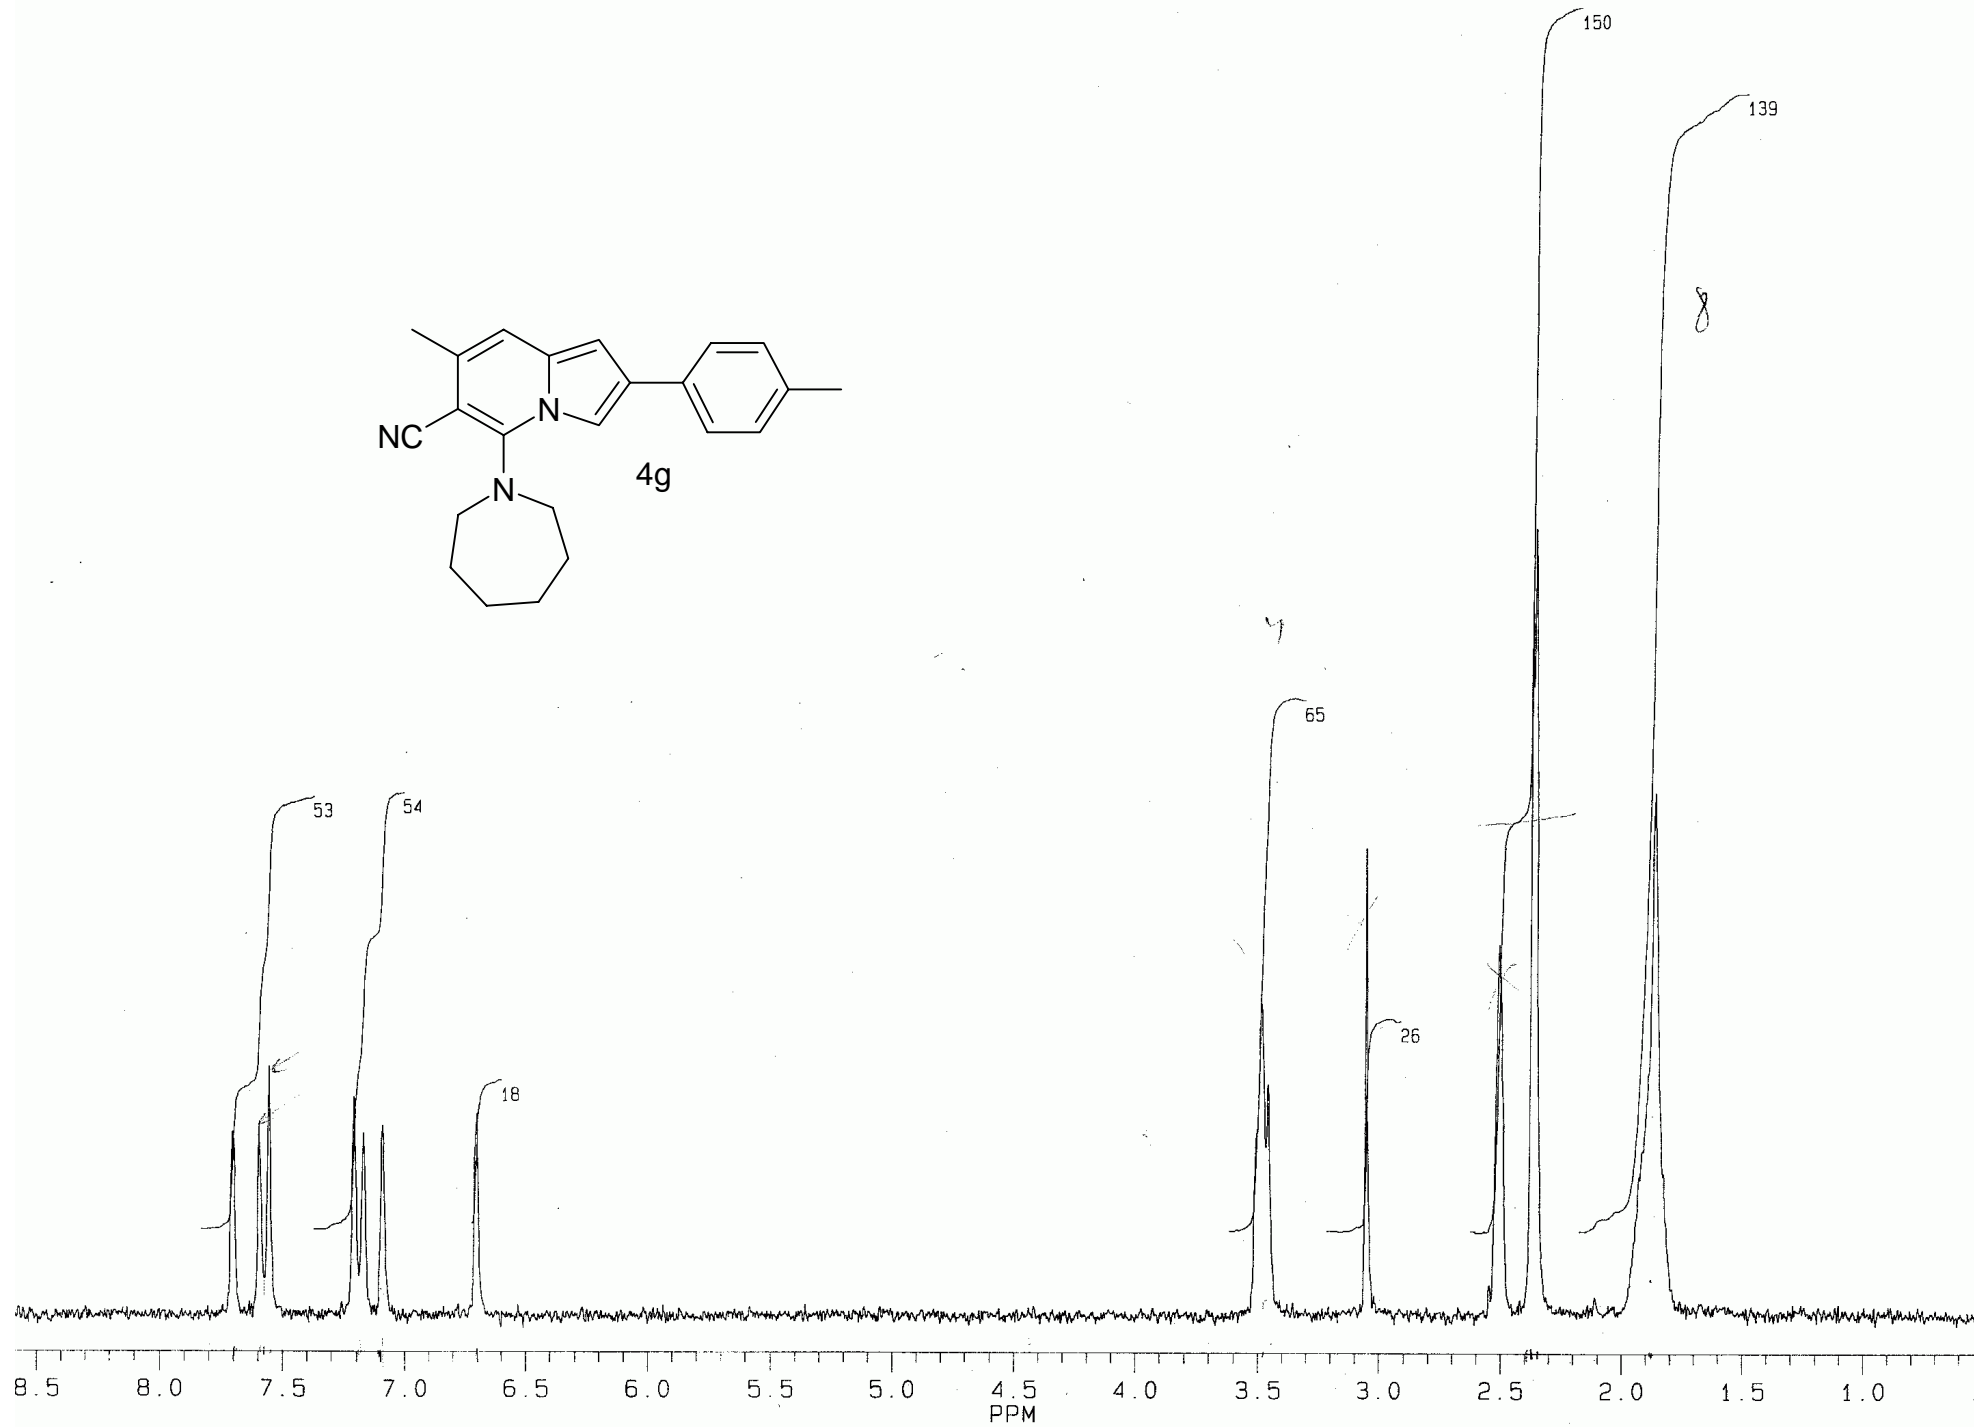

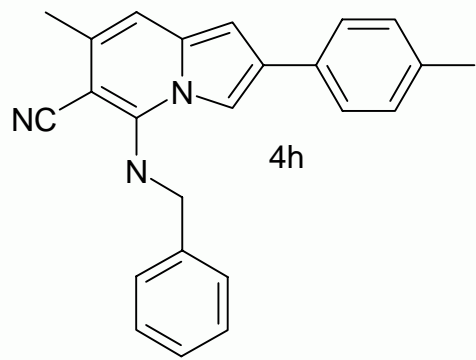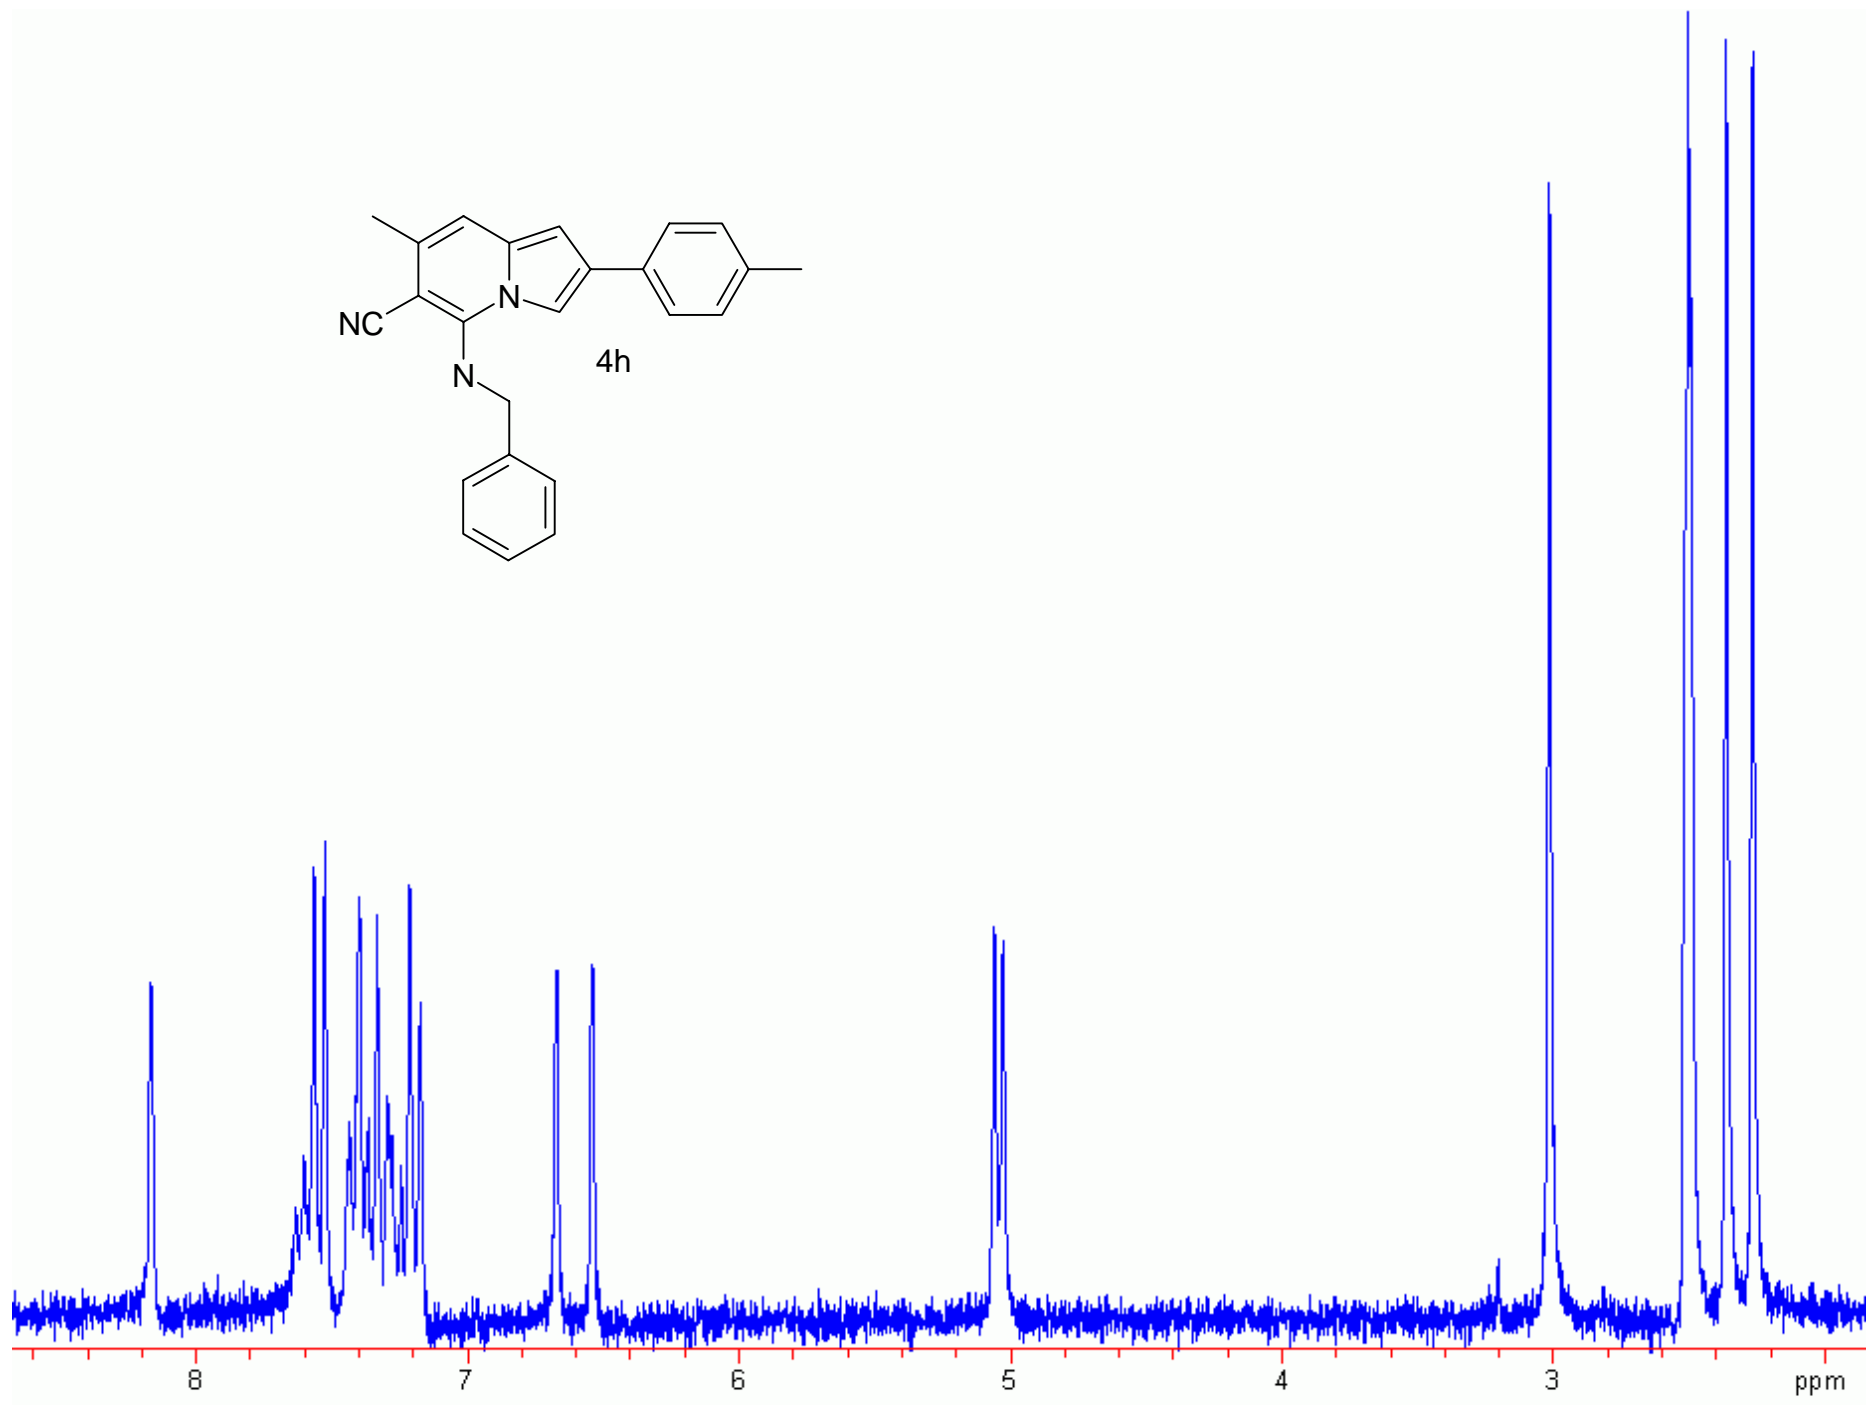

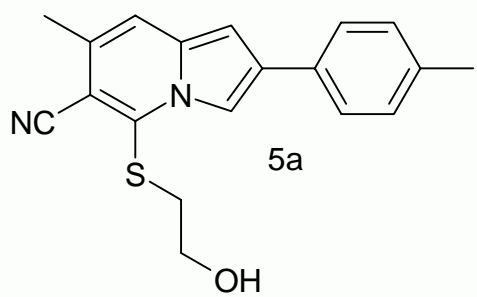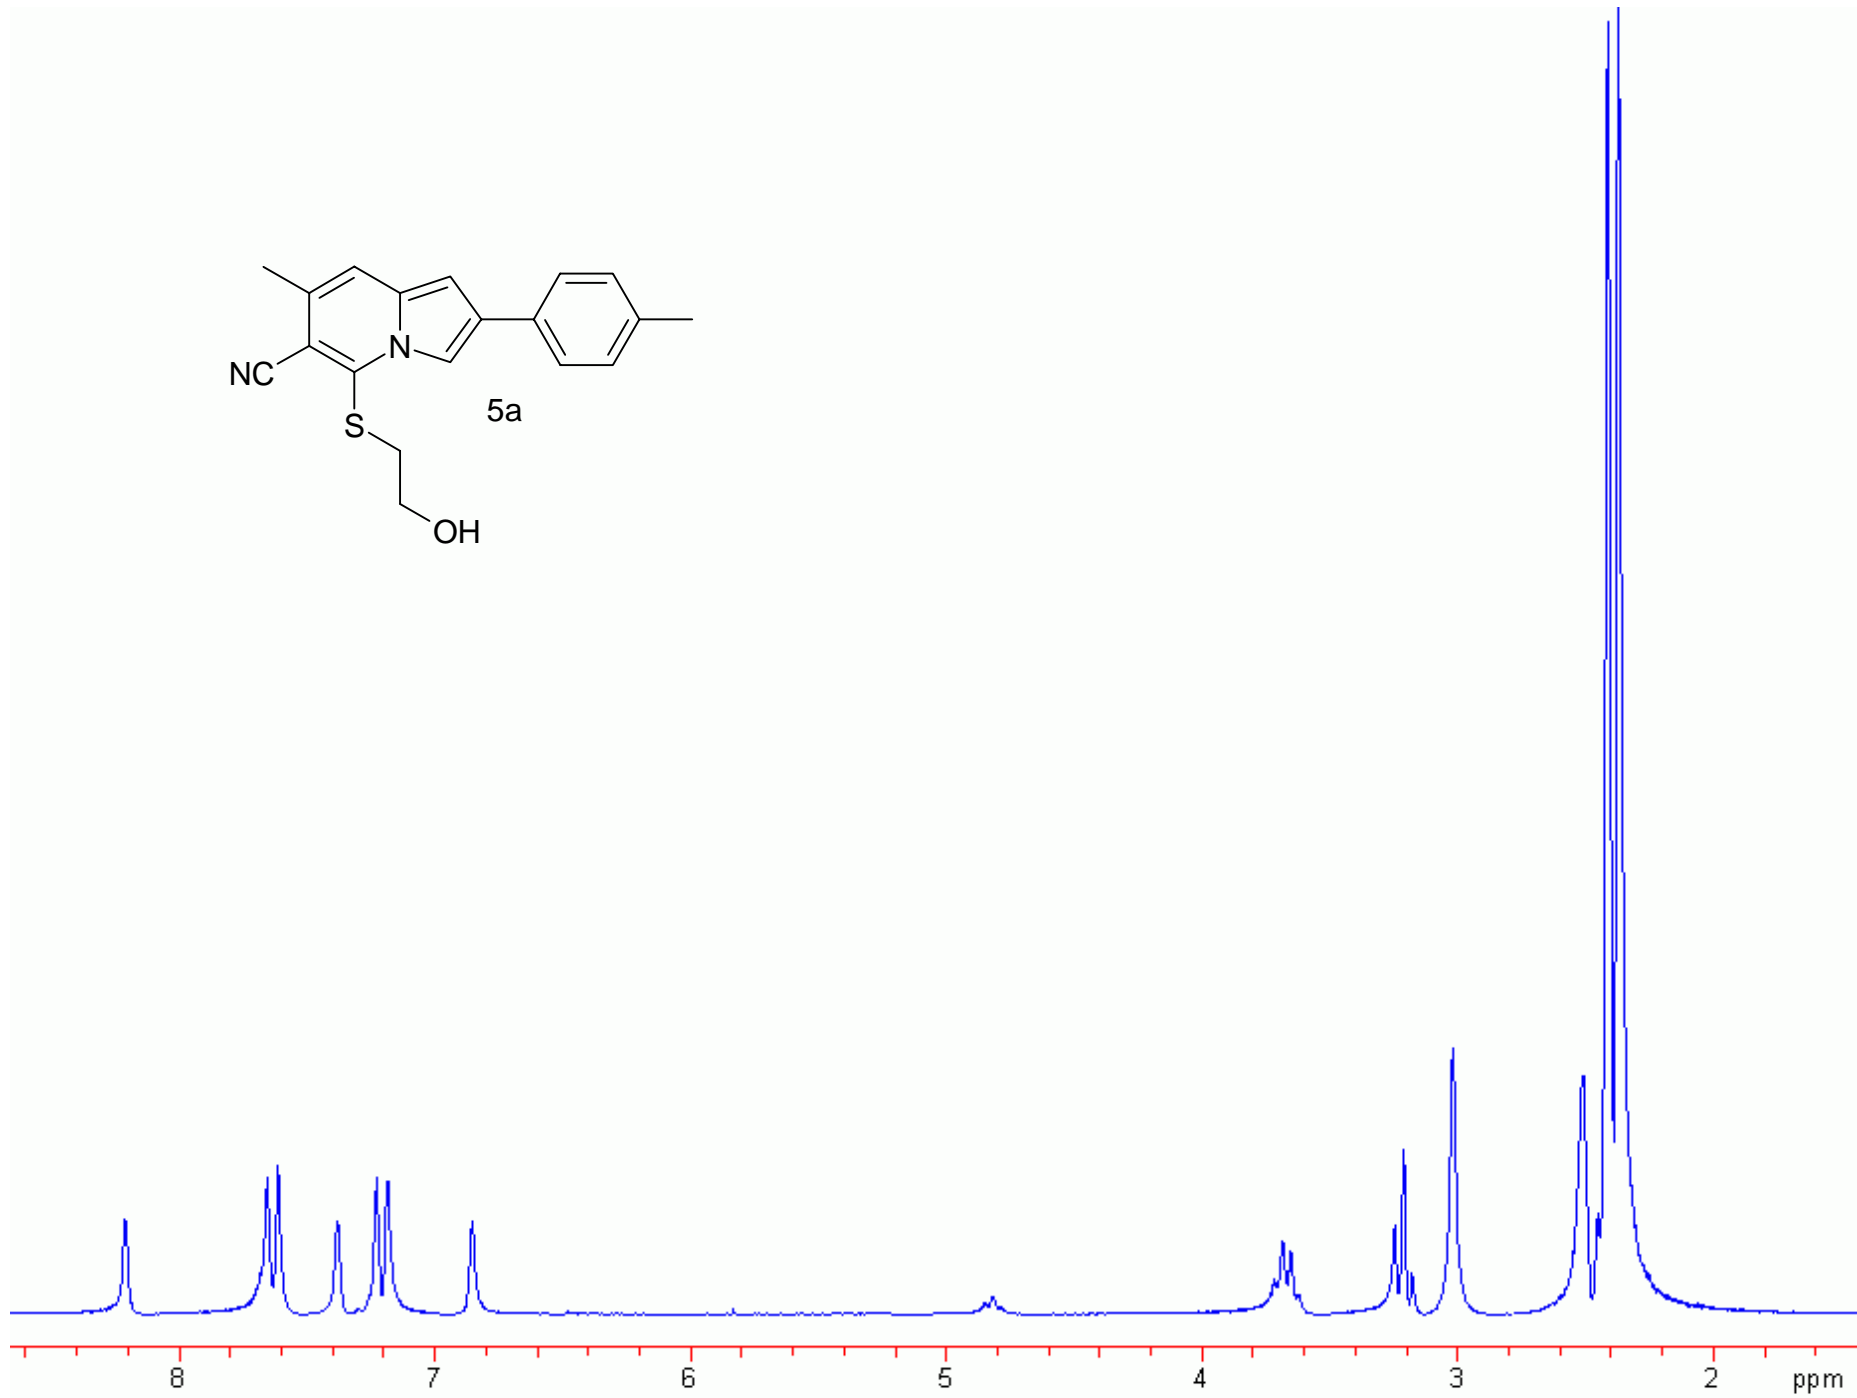



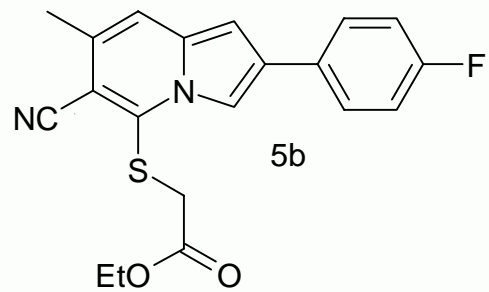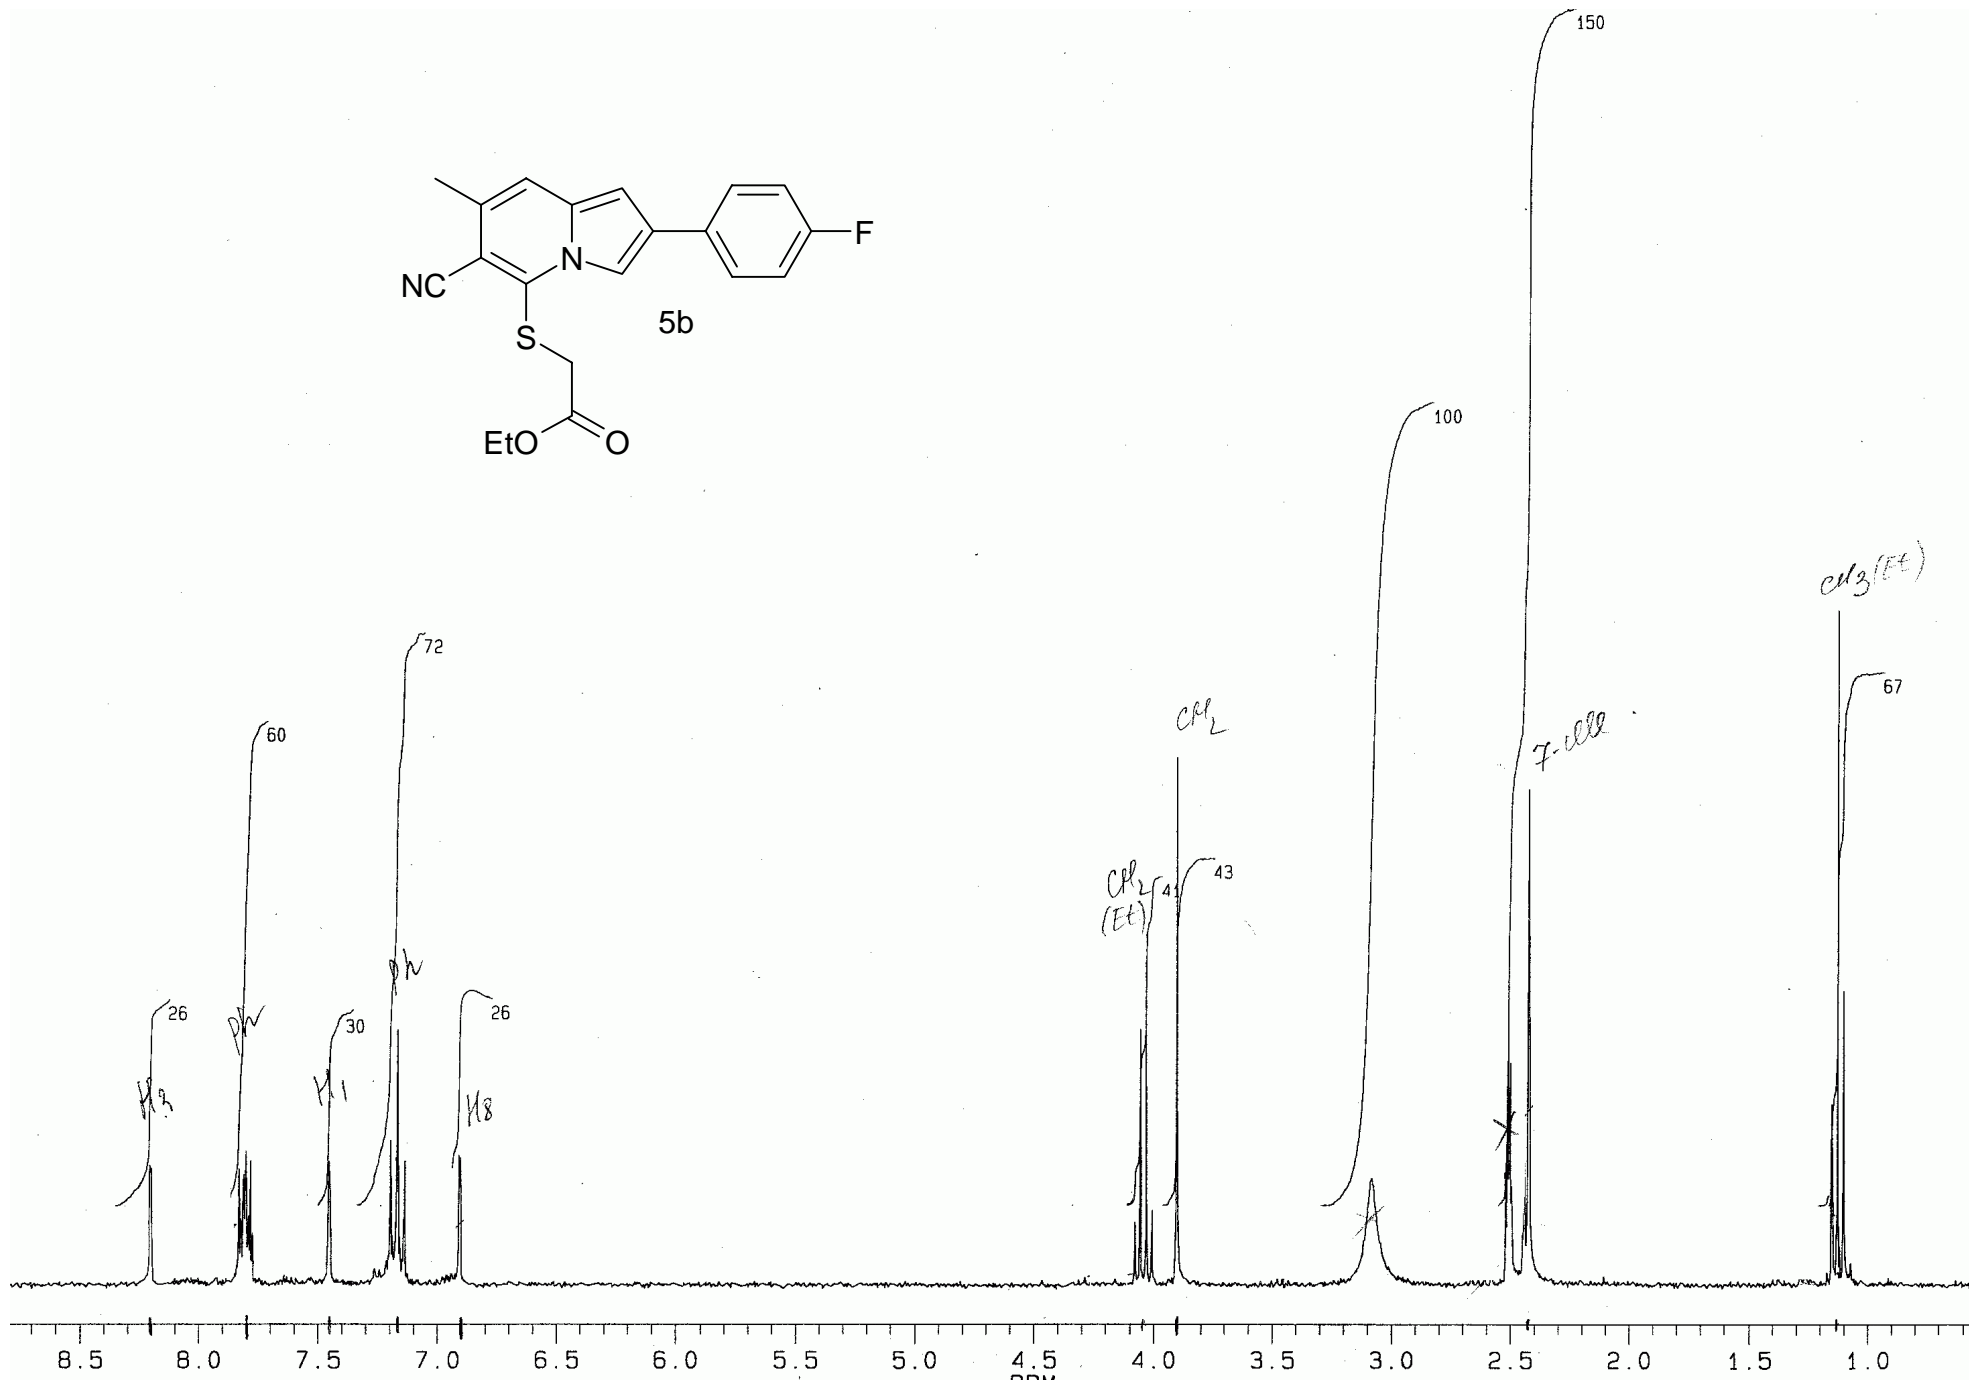

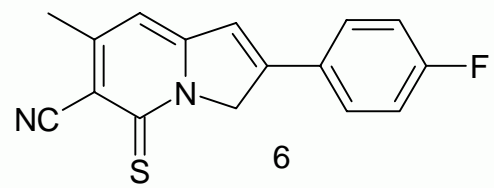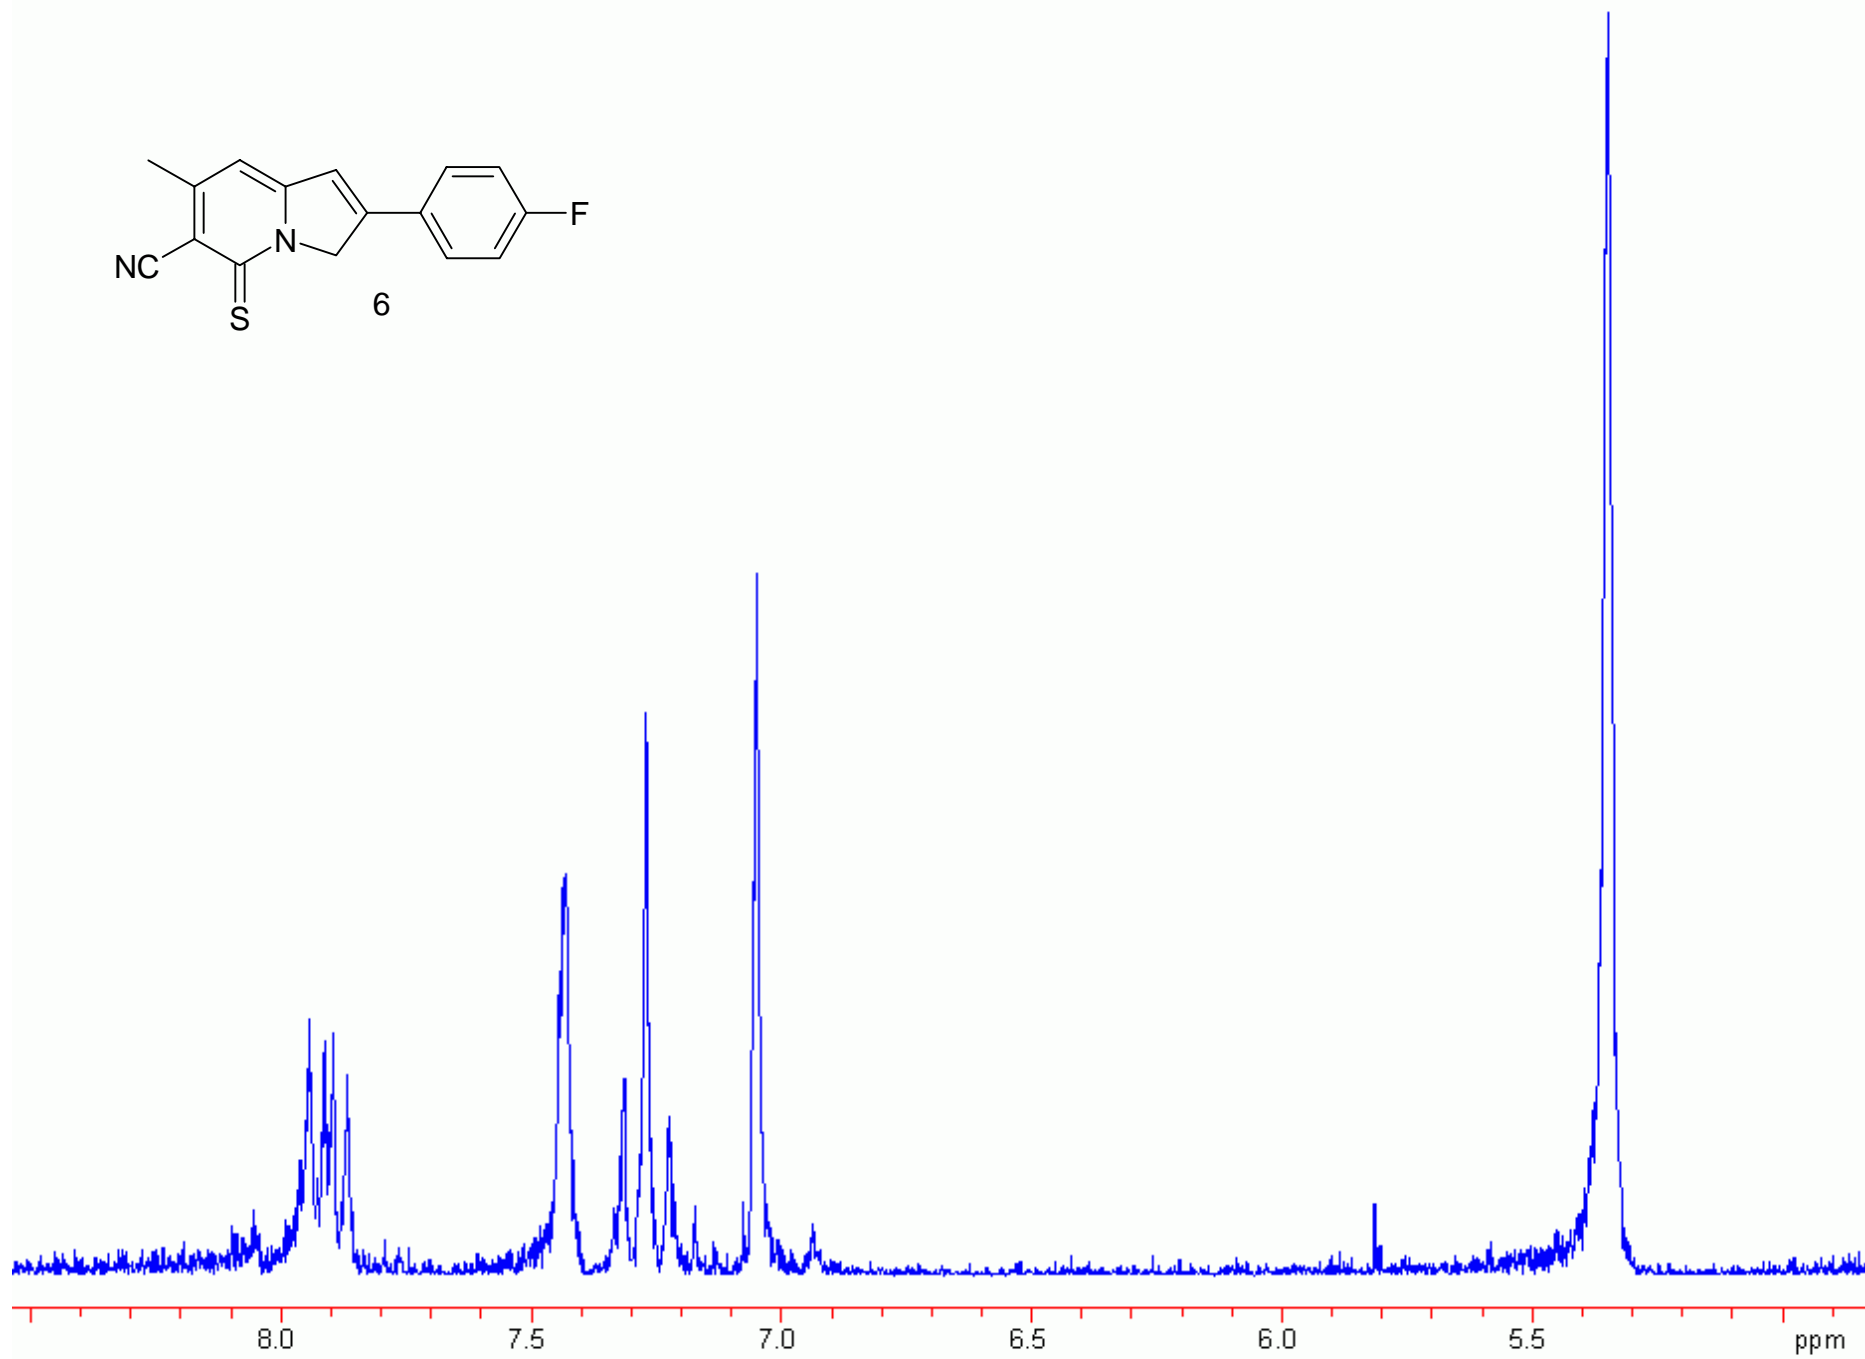

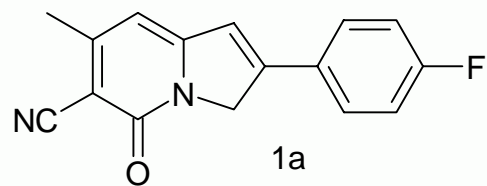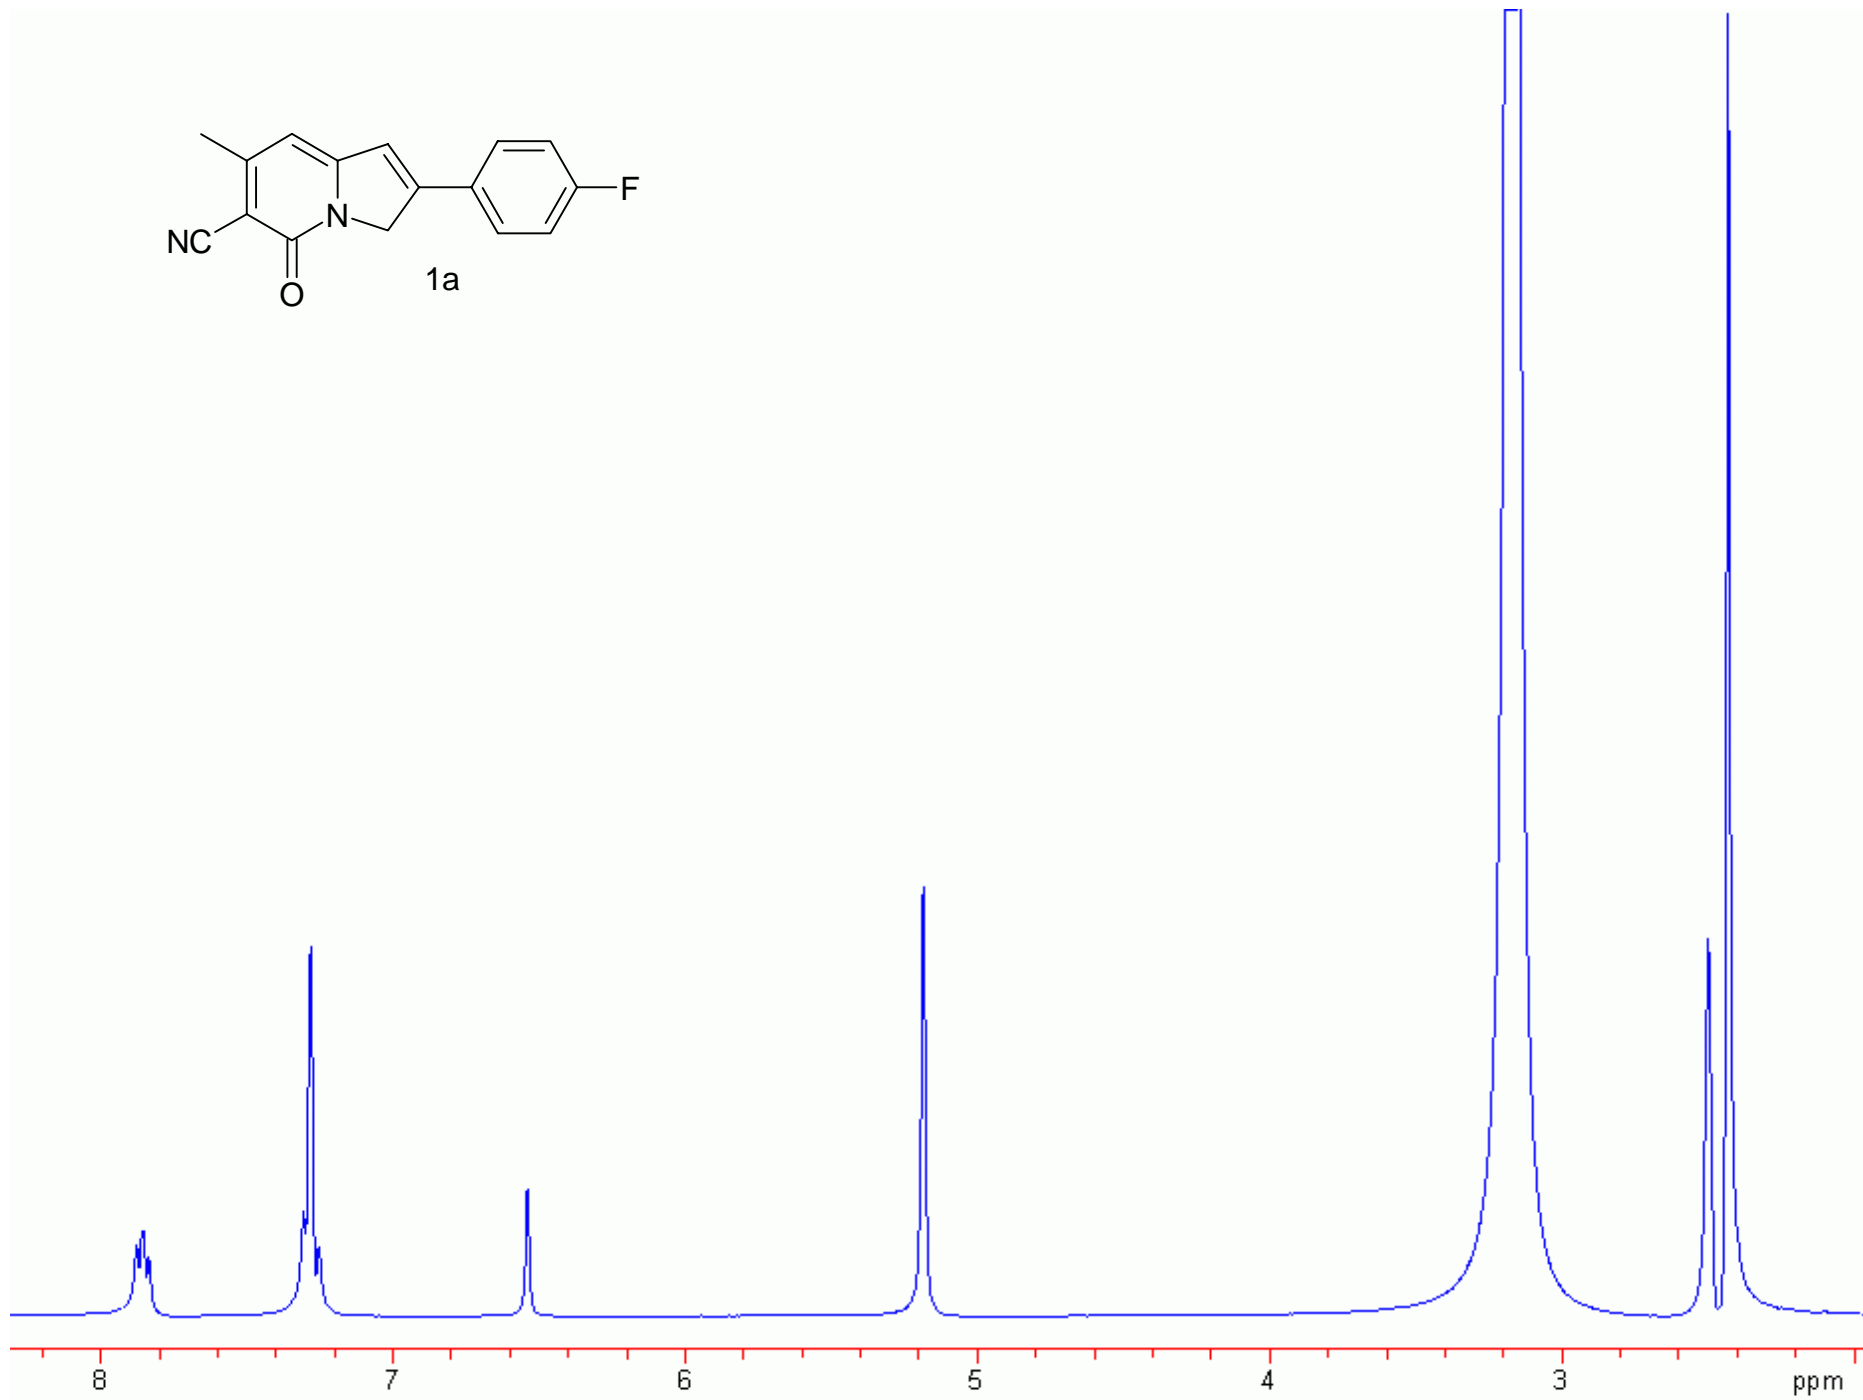

Supplement: Additional file 2 [file 1860-5397-1-9-S2.pdf]
